1

2 ASYMMETRIC EXPRESSION OF ARGONAUTES IN  
3 ARABIDOPSIS REPRODUCTIVE TISSUES

4

5

6 Jullien PE<sup>1,2\*</sup>, Bonnet DMV<sup>1</sup>, Pumplin N<sup>2</sup>, Schröder JA<sup>1</sup>, and Voinnet O<sup>2</sup>

7

8 <sup>1</sup> Institute of Plant Sciences, University of Bern, Bern, Switzerland.

9 <sup>2</sup> Institute of Molecular Plant Biology, Swiss Federal Institute of Technology Zurich  
10 (ETH-Zurich), Zurich, Switzerland.

11

12 AUTHOR ORCID IDs:

13 Pauline E. Jullien (#0000-0003-1212-3246)

14 FOR CORRESPONDENCE:

15 Pauline E. Jullien (pauline.jullien@ips.unibe.ch)

16

17 Running title: Argonautes during reproduction

18 Key words: Argonautes, small RNA, reproduction, Gametes, endosperm, embryo

19 Summary statement: Arabidopsis genome encodes ten Argonautes proteins showing distinct  
20 expression pattern as well as intracellular localisation during sexual reproduction.

21

## 22 ABSTRACT

23 During sexual reproduction, development of a totipotent zygote from the fusion of highly  
24 differentiated gametes is accompanied by dynamic regulation of gene expression. This  
25 notably involves RNA silencing operated by Argonautes (AGO) effector proteins. While  
26 AGOs' roles during *Arabidopsis* somatic life have been extensively investigated, less is  
27 known about their expression during reproduction, which proceeds via double-fertilization of  
28 an egg and a central cell, leading respectively to the embryo and a supportive tissue known as  
29 endosperm. Using full-locus translational reporters for all ten *Arabidopsis* AGOs, we uncover  
30 cell-specific expression patterns and AGO-intrinsic subcellular localizations in reproductive  
31 tissues. However, while some *Arabidopsis* AGOs are enriched in both male and female  
32 gametes, *i.e.* sperm and egg cells, they are comparably low-expressed in accessory, *i.e.*  
33 vegetative and central cells. Likewise, following fertilization, several AGOs are expressed in  
34 the early embryo, yet below detection in the early endosperm. Thus, there is pre- and post-  
35 fertilization asymmetry between the embryo and endosperm lineages. Later during embryo  
36 development, AGO9, AGO5 and AGO7 are restricted to the apical embryonic meristem in  
37 contrast to AGO1, AGO4, AGO6 and AGO10. Beside shedding light onto potential roles for  
38 RNA silencing during *Arabidopsis* reproduction, the plant material generated here should  
39 constitute a valuable asset enabling functional AGOs studies in many tissues beyond those  
40 involved in reproduction.

41

## 42 INTRODUCTION

43 In most eukaryotes, sexual reproduction involves specialized cellular structures and entails  
44 complex orchestration of the timing and spatial localization of gene expression. In the model  
45 plant *Arabidopsis*, reproduction involves the development of a haploid structure, called  
46 gametophyte, in both male and female reproductive organs. The mature male gametophyte, or  
47 pollen grain, contains three cells: one vegetative cell and two gametes known as sperm cells.  
48 The mature female gametophyte, on the other hand, contains seven cells: three antipodal cells  
49 of unknown function, two synergides involved in pollen tube reception and guidance, one  
50 central cell and one egg cell. Fertilization of the egg cell by one of the sperm cells forms the  
51 embryo proper that later develops into the next-generation plant. Fertilization of the  
52 homodiploid central cell by the second sperm cell forms the endosperm, a nourishing tissue  
53 required for proper seed development. In addition, the female gametophyte as well as the  
54 developing endosperm and embryo are surrounded by 4 layers of maternal integuments  
55 connected to the mother plant's vasculature at the chalazal pole.

56 Small RNAs (sRNA) are key regulators of gene expression. Their importance during sexual  
57 reproduction has been highlighted by the discovery of a class of reproduction-specific sRNA  
58 known as Piwi-interacting RNAs (piRNAs) in animals (Castel and Martienssen, 2013; Weick  
59 and Miska, 2014). Likewise, the importance of reproduction-specific small RNAs has also  
60 been recognized in plants (Mosher and Melnyk, 2010; Van Ex et al., 2011). Beyond the roles  
61 of microRNAs (miRNAs) in embryonic development, small interfering (si)RNA tame  
62 transposon in the pollen (Slotkin et al., 2009) and during ovule development (Olmedo-Monfil  
63 et al., 2010). siRNAs also might be linked to hybrid seed lethality as suggested by their  
64 implication in regulating parental genome dosage (Borges et al., 2018; Martinez et al., 2018).  
65 RNA silencing in plants can be divided into Post-Transcriptional Gene Silencing (PTGS) and  
66 Transcriptional Gene Silencing (TGS) processes (Bologna and Voinnet, 2014; Borges and  
67 Martienssen, 2015; Mallory and Vaucheret, 2010; Schröder and Jullien, 2019). Both  
68 pathways rely on the generation of small (s)RNAs of 21, 22 or 24 nucleotides in length by  
69 DICER-LIKE enzymes, of which there are four paralogs in *Arabidopsis* (DCL1-4). These  
70 sRNA execute PTGS or TGS upon their loading into ARGONAUTE (AGO) effector  
71 proteins. Despite the established impact of sRNA-pathway mutations in plant biology, little is  
72 known of the expression profiles of silencing-pathway proteins in reproductive and post-  
73 reproductive, early embryonic tissues. In particular, the cell-specific expression and  
74 subcellular localization patterns of AGOs remain largely unknown.

75 The *Arabidopsis* genome encodes ten AGO genes divided into three phylogenetic clades  
76 (Mallory and Vaucheret, 2010) conserved among flowering plants (Fang and Qi, 2015;  
77 Zhang et al., 2015). Clade I consist of AGO1/5/10, with AGO1 being the ubiquitously-  
78 expressed member. *ago1* mutants display aberrant sporophytic phenotypes likely due to  
79 AGO1's key role in executing miRNA functions. Embryonic *ago1* mutant phenotypes were  
80 only observed, however, from the torpedo stage (Lynn et al., 1999). The second clade I  
81 member, AGO10, has been implicated in the control of shoot apical meristem (SAM) identity  
82 from late stages of embryo development (Lynn et al., 1999; Moussian et al., 1998), despite  
83 being expressed from very early stages (Tucker et al., 2008). In fact, early embryo  
84 phenotypes were only observed in the double *ago1ago10* mutant, thereby suggesting  
85 functional redundancy between the two proteins at this stage, possibly in executing miRNA-  
86 directed silencing. Supporting this notion, early embryo phenotypes are observed in *dcl1*  
87 mutants exhibiting compromised miRNA processing (Nodine and Bartel, 2010; Seefried et  
88 al., 2014; Willmann et al., 2011). Contrasting with that of AGO1 and AGO10, AGO5  
89 expression is substantially enriched in reproductive tissues (Tucker et al., 2012). A dominant  
90 *AGO5* allele (*ago5-4*) arrests female gametophyte development altogether (Tucker et al.,  
91 2012) while *ago5* recessive mutants display early flowering (Roussin-Léveillé et al., 2020).

92 The AGO Clade II is constituted of AGO7, AGO2 and AGO3. AGO7 has a well-established  
93 role in leaf development, yet no evident function in reproductive tissues has been described  
94 thus far. Despite AGO2 and AGO3 displaying higher expression levels in reproductive tissue,  
95 their role(s) during reproduction remains, likewise, elusive because no overt developmental  
96 phenotypes were observed in the corresponding mutants (Jullien et al., 2020). Clade III  
97 includes AGO4/6/9/8, which, with the exception of the truncated AGO8 protein (Takeda et  
98 al., 2008), have all been implicated in DNA methylation commonly referred as the RNA-  
99 dependent-DNA-methylation (RdDM; (Matzke and Mosher, 2014). The RdDM pathway is  
100 required for the establishment of new DNA methylation pattern as well as the maintenance of  
101 cytosine methylation in the CHH context. AGO4 and AGO6 are mostly ubiquitously  
102 expressed, whereas AGO8 and AGO9 seem specific for reproductive tissue (Havecker et al.,  
103 2010; Olmedo-Monfil et al., 2010; Wuest et al., 2010). In particular, AGO9 is involved in  
104 meiosis, megaspore mother cell (MMC) differentiation and transposon silencing in the egg  
105 cell (Oliver et al., 2014; Olmedo-Monfil et al., 2010). MMC differentiation is also impeded in  
106 *ago4*, *ago6* and *ago8* mutants (Hernández-Lagana et al., 2016) suggesting an important role  
107 for RdDM during this process.

108 To help deciphering the roles of sRNA pathways in reproductive processes, we have  
109 generated stable transgenic lines expressing full length fluorescently tagged AGOs under  
110 their cognate endogenous promoter and analyzed their expression as well as intracellular  
111 localization in reproductive tissues.

## 112 RESULTS AND DISCUSSION

### 113 ARGONAUTES TRANSLATIONAL REPORTERS

114 In order to investigate the expression pattern and intracellular localization of the ten  
115 *Arabidopsis* AGO proteins, we generated full-locus reporter constructs in which the open  
116 reading frames (ORFs) of fluorescent proteins were fused to each AGO coding sequence in  
117 their genomic contexts, using multiple Gateway<sup>TM</sup> cloning. We engineered N-terminal  
118 translational fusions, since N-terminal, but not C-terminal, tagging preserves *Arabidopsis*  
119 AGOs' functionality (Carbonell et al., 2012). Each AGO construct was cloned under the  
120 corresponding presumptive promoter (1.3kb to 2.5kb upstream start codons) and terminators  
121 (467bp to 1kb downstream of stop codons). This generated pAGO:FP-AGO constructs,  
122 where "FP" corresponds to either the Green Fluorescent Protein (GFP) or mCherry (mCh).  
123 For the sake of simplification, the constructs will be referred to FP-AGOX (where X is the  
124 number of each AGO1-10) in the main text and FPX in the figures. For example,  
125 pAGO1:mCherry-AGO1 will be shortened to mCherry-AGO1 in the main text and to mCh1  
126 in figures. A detail map of the constructs can be found in Fig. S1 and a summary of their  
127 expression pattern in Fig.S11. Functional complementation was validated for AGO1, AGO4,  
128 AGO5, AGO6 and AGO7 and can be found in Fig. S2, Fig. S3, Fig. S4, Fig. S5 and Fig. S6  
129 respectively.

### 130 AGO EXPRESSION PATTERNS IN THE MATURE FEMALE GAMETOPHYTE

131 To gain insights into AGO protein expression patterns in the mature female gametophyte, we  
132 analyzed fluorescent signals of each protein fusion, using confocal microscopy. Almost all  
133 AGOs accumulate in the mature female gametophyte (Fig. 1A-K) except GFP-AGO10 (Fig.  
134 1D) and mCherry-AGO3 (Fig. 1J), which are only detected in the maternal integument. The  
135 clade I mCherry-AGO1 and mCherry-AGO5 reporters display similar accumulation patterns  
136 in the female gametophyte (Fig. 1B-C). They are mainly detected in the egg cell and, to a  
137 lower extent, in the central cell. mCherry-AGO1 and mCherry-AGO5 also accumulate in the  
138 maternal integument, with mCherry-AGO1 being detected in both the inner and outer

139 integument, and mCherry-AGO5 solely in the former, as previously reported (Tucker et al.,  
140 2012). Both mCherry-AGO1 and mCherry-AGO5 signals are particularly pronounced in the  
141 nucellus at the chalazal pole of the ovule. Clade I, GFP-AGO10 mainly accumulates in the  
142 inner-integument of the ovule with a stronger signal at the chalazal seed coat and in vascular  
143 tissues of the funiculus (Fig. 1D, Fig. S7A-B).

144 The main clade III *i.e.* RdDM AGOs, mCherry-AGO4 and mCherry-AGO6, accumulate  
145 ubiquitously in both integuments and female gametophyte, with stronger signals in the egg  
146 cell (Fig. 1E-F). The reproduction-stage-specific RdDM AGO's, mCherry-AGO9 and  
147 mCherry-AGO8, show more spatially-restricted expression patterns (Fig. 1G-H). mCherry-  
148 AGO9 accumulates mainly in the egg cell within the female gametophyte but can be  
149 detected, albeit at lower levels, in the central cell. Strong mCherry-AGO9 accumulation is  
150 also detected in the nucellus and funiculus (Figure 1H and Fig. S8A), consistent, for the latter,  
151 with previous *in situ* hybridization results (Olmedo-Monfil et al., 2010). mCherry-AGO8 is  
152 specifically detected in the mature egg cell (Fig. 1G). Egg cell expression of both AGO8 and  
153 AGO9 is supported by conclusions drawn from transcriptional fusions for both AGO9 and  
154 AGO8 (Sprunck et al., 2019) as well as transcriptomic data analyses (Fig. S9B, (Wuest et al.,  
155 2010)). However, mCherry-AGO9 protein fusion expression in the egg cell does not agree  
156 with previously published results obtained by immuno-fluorescence (Olmedo-Monfil et al.,  
157 2010). Like mCherry-AGO8, the clade II-member mCherry-AGO2 is also specifically  
158 detected in the egg cell (Fig. 1I) while clade II-member mCherry-AGO3 is solely detected in  
159 the chalazal seed coat of the ovule (Fig. 1J; (Jullien et al., 2020)). The last clade II-member,  
160 GFP-AGO7, is detected in all cell types of the female gametophyte and surrounding  
161 integument, with significant enrichment in the egg cell, similarly to AGO1 (clade I), AGO4  
162 and AGO6 (clade III) (Fig. 1K).

163 Overall, our analysis shows that all ten *Arabidopsis* AGOs are detected in mature ovules  
164 before fertilization. Within the female gametophyte, their accumulation seems to be  
165 particularly enriched in the egg cell compared to the central cell. Preferential AGO  
166 expression in the egg cell was confirmed using previously published female gametophyte  
167 transcriptome data obtained by laser-capture microdissection (Fig. S9A, (Wuest et al., 2010)).  
168 Noteworthy, our data, together with the potential *ago8* phenotype previously described  
169 during MMC development (Hernández-Lagana et al., 2016), suggest that AGO8 might be  
170 functional. Nonetheless, *AGO8* is commonly thought to be a pseudogene, as its ORF displays  
171 a premature stop codon predicted to result in a truncated protein containing a PAZ domain

172 but not the catalytic PIWI domain (Takeda et al., 2008). Our observation of mCherry-AGO8  
173 protein specifically in the egg cell (Fig. 1G) could therefore reflect the accumulation of a  
174 truncated mCherry-AGO8 protein in this particular cell type. We could not test this  
175 hypothesis using western blotting, however, due to the very low expression levels of  
176 mCherry-AGO8. It is nevertheless tempting to hypothesize that a truncated AGO8 protein  
177 could act as a dominant-negative sRNA regulator specifically in the egg cell, as was shown  
178 for the dominant *ago5-4* allele which similarly encodes a truncated PAZ-proficient yet PIWI-  
179 deficient protein (Tucker et al., 2012). Taken together, our results uncover a complex sRNA-  
180 loading landscape likely granting functional diversity in the egg cell.

### 181 **AGO EXPRESSION PATTERNS IN THE MALE GAMETOPHYTE**

182 Analysis of the translational reporters in mature pollen grains (Fig. 2A-H) revealed a  
183 preferential enrichment of some AGOs in sperm cells. Indeed, mCherry-AGO1, mCherry-  
184 AGO2, GFP-AGO7, mCherry-AGO4 and mCherry-AGO9 were solely detected in those cells  
185 (Fig. 2 B, D,F-H). mCherry-AGO5 and mCherry-AGO6 were mainly detected in sperm cells,  
186 but also in the vegetative cell, albeit only at substantially lower levels (Fig. 2 C, E). AGO5  
187 sperm cell expression was previously reported (Borges et al., 2011; Tucker et al., 2012).  
188 Signals from the mCherry-AGO3, mCherry-AGO8 and GFP-AGO10 reporters were not  
189 detected in mature pollen.

190 To address if paternally-expressed AGOs could be potentially transmitted during fertilization,  
191 we investigated the presence of the fusion proteins' fluorescent signals in germinated pollen  
192 (Fig. 2I-P). All AGOs exhibiting sperm cells expression were indeed also detected in  
193 germinated pollen, suggesting that AGO-loaded sRNAs of paternal origin could be  
194 transported to the egg cell and potentially regulate gene expression in the zygote at, or shortly  
195 after, fertilization. Although such phenomena have been highlighted in the context of  
196 mammalian embryonic development (Conine et al., 2018; Sharma et al., 2018; Yuan et al.,  
197 2016), they have been seldom documented in plants, including in *Arabidopsis*. Indeed, most  
198 mutants affecting embryonic development are sporophytic recessive rather than showing a  
199 paternal gametophytic effect (Meinke, 2020), which is the case for mutant alleles of *DCL1*,  
200 encoding the main microRNA processing enzyme in *Arabidopsis* (Nodine and Bartel, 2010).  
201 Recently, however, a mutant allele of *MIR159* was reported to display paternal effects on  
202 endosperm development owing to the downregulation of the MYB33 transcription factor  
203 (Zhao et al., 2018b). The high expression of miR159 in sperm cell as well as the very early



204 nature of the observed phenotype suggest indeed that miR159 could be delivered paternally at  
205 fertilization.

#### 206 **AGO EXPRESSION PATTERNS IN THE EARLY SEED**

207 To gain insights into AGO accumulation during early seed development, we observed  
208 fluorescent signals in seeds at one Day-After-Pollination (1 DAP), using confocal  
209 microscopy (Fig. 3A-I). At this stage, we could detect expression of eight out of ten  
210 *Arabidopsis* AGOs, while signals from mCherry-AGO2 and mCherry-AGO8 were below  
211 detection limit. Clade I mCherry-AGO1 is detected in both inner and outer integument layers  
212 in the sporophytic tissue as well as in the embryo, but is below detection in the endosperm  
213 (Fig. 3A). Similarly, clade I mCherry-AGO5 is detected in the embryo and inner (but not  
214 outer) integument, while it is excluded from the endosperm (Fig. 3B). Despite not being  
215 detected in the egg cell, clade I GFP-AGO10 could be detected in the early embryo but not in  
216 the endosperm (Fig. 3C). Strong GFP-AGO10 accumulation is also observed in the  
217 funiculus' vasculature and the seed/ovule vascular termination (Fig. S7). As previously  
218 described, accumulation of the clade II mCherry-AGO3 is limited to the chalazal seed coat  
219 (Fig. 3H; (Jullien et al., 2020)). Clade II GFP-AGO7 is detected in all cell types except the  
220 endosperm, and its accumulation is particularly strong in the chalazal seed coat (Fig. 3I).

221 Among the clade II AGOs involved in RdDM, mCherry-AGO4 shows the strongest  
222 accumulation, especially in the sporophytic tissues (Fig. 3D). mCherry-AGO4 can be  
223 detected in the early embryo (Fig 3E) but below detection in the endosperm. The expression  
224 pattern of mCherry-AGO6 is similar to that of mCherry-AGO4 (Fig.3F), although the signal  
225 is of lower intensity. This result agrees with the known redundancy of AGO4 and AGO6 in  
226 mediating DNA methylation and TGS at some genetic loci (Stroud et al., 2012; Zheng et al.,  
227 2007). mCherry-AGO9 could be detected in the embryo and also in the endosperm, although  
228 not in the integuments (Fig. 3G). In fact, mCherry-AGO9 is visible from the first nuclear  
229 division of the endosperm, upon which its signal decreases in intensity, although it is still  
230 detected at the 4-cells embryo stage (Fig. 3G and Fig. S8B-C). Based on our reporter  
231 constructs, AGO9 appears therefore, to be the only AGO detectable during endosperm  
232 development.

233 To conclude, we observe a strong asymmetry of AGOs' patterns between the endosperm and  
234 the embryonic lineages. This difference is supported by LCM transcriptomic data from  
235 developing seeds (Fig. S8, (Belmonte et al., 2013)) and suggests a less active involvement of



236 RNA silencing pathways in the endosperm compared to the embryo, during early seed  
237 development. In *Arabidopsis*, the RdDM pathway maintains cytosine DNA methylation in  
238 the CHH context (where H is any nucleoside but G), which cannot be perpetuated by  
239 maintenance DNA methylases. This process relies on the constant action of *de novo* DNA  
240 methyltransferases (DRM1 and DRM2) that are guided to their cognate target loci by  
241 interacting with siRNA-loaded, Class II AGOs. Similarly to what was reported for the *de*  
242 *nov*o DNA methyltransferases (Jullien et al., 2012), the asymmetric expression of Class II  
243 AGOs observed between the embryonic and endosperm lineages could contribute to the high  
244 CHH methylation observed in the former compared to the latter (Bouyer et al., 2017; Gehring  
245 et al., 2009; Hsieh et al., 2009; Kawakatsu et al., 2017).

#### 246 **AGO EXPRESSION PATTERNS IN HEART-STAGE EMBRYO**

247 In order to investigate AGO accumulation patterns in the differentiated zygote, we dissected  
248 heart-stage embryos in which most early developmental decisions have already taken place,  
249 and performed confocal imaging using the fluorescently tagged AGO transgenic lines (Fig.  
250 4A-H). As previously reported (Du et al., 2019; Lynn et al., 1999), clade I mCherry-AGO1 is  
251 expressed in all cells of the heart-stage embryo (Fig. 4B). Similarly, we observed a  
252 ubiquitous expression of the clade II mCherry-AGO4 and mCherry-AGO6 (Fig. 4E-F). By  
253 contrast, clade III mCherry-AGO2, mCherry-AGO3 and clade II mCherry-AGO8 could not  
254 be detected in the heart-stage embryo. Clade I GFP-AGO10 displayed its previously reported  
255 pattern (Du et al., 2019; Tucker et al., 2008), with fluorescent signals observed in the adaxial  
256 part of cotyledons and in the pre-vasculature (Fig 4D).

257 The three remaining AGOs, AGO5 (clade I), AGO9 (clade III) and AGO7 (clade II)  
258 accumulate specifically in the shoot apical meristem region (SAM) of the heart-stage embryo  
259 (Fig. 4C, G, H), a pattern already documented for AGO5 using a YFP fluorescent reporter  
260 (Tucker et al., 2012). In agreement with our results, AGO5, AGO7, and AGO9 transcript  
261 were both found to be enriched in meristematic stem cells at the embryonic stage (Gutzat et  
262 al., 2018). Although AGO7 and AGO9 functions in meristems remain to be investigated,  
263 recent work suggests that AGO5 is involved in regulating flowering, perhaps via a floral  
264 meristem-specific activity (Roussin-Léveillé et al., 2020). Indeed, *ago5* mutants display an  
265 early flowering phenotype without overtly altered leaf morphology (Fig.S4, (Roussin-  
266 Léveillé et al., 2020)). This effect on flowering is thought to proceed through AGO5-  
267 miR156 specific interactions repressing, in turn, accumulation of SPL transcription factors.  
268 However, miR156 was previously shown to affect both flowering and leaf morphology (Wu

269 et al., 2009), thereby suggesting a more complex underpinning to the *ago5* phenotype. This  
270 possibly involves differential AGO loading and functions for miR156 or highly sequence-  
271 related miR157 isoforms in meristematic regions (Ebhardt et al., 2010; He et al., 2018).

## 272 **AGO INTRACELLULAR LOCALIZATION PATTERNS**

273 *Arabidopsis* AGO1 and AGO4 have been shown to shuttle between the cytoplasm and the  
274 nucleus although their respective steady-state subcellular localizations seem to reflect their  
275 involvement in either PTGS (clade I and II) and TGS/RdDM (Clade III); AGO1 is mostly  
276 cytoplasmic and AGO4 nuclear (Bologna et al., 2018; Ye et al., 2012). In agreement with  
277 their involvement in Clade I and II, mCherry-AGO1, mCherry-AGO5, mCherry-AGO2,  
278 mCherry-AGO3, GFP-AGO10 are mostly localized in the cytoplasm in reproductive cells  
279 (Fig. 1B-D, Fig.1I-J, Fig.3A-C, Fig3H, Fig. 4B-D). Their cytoplasmic localization is  
280 consistent with studies showing their association with the translation machinery (Jullien et  
281 al., 2020; Marchais et al., 2019). However, we observed that mCherry-AGO1, mCherry-  
282 AGO5, mCherry-AGO2 form cytosolic aggregates observed only certain cell types such as  
283 the nucellus and sperm cells (Fig. 1B-C and Fig. 2B-C, G). Nonetheless, caution should be  
284 exerted in interpreting these observations given that artefactual aggregation has been reported  
285 with mCherry-tagged proteins (Cranfill et al., 2016; Landgraf et al., 2012). Since it is likely  
286 that these AGO foci occur in tissues where AGO1, AGO5 and AGO2 are particularly highly  
287 expressed, further work will be required to assess if mCherry-AGO1, mCherry-AGO5, and  
288 mCherry-AGO2 aggregates represent relevant biological entities.

289 The main Clade II AGOs, mCherry-AGO4 and mCherry-AGO6, are localized in the nucleus  
290 in all reproductive cell types analyzed (Fig. 1E-F, Fig. 2D-E, Fig. 3D-F, Fig. 4E-F).  
291 Occasionally, cytoplasmic localization could be observed in the ovule integument or embryo  
292 likely due to the disruption of the nuclear membrane during cell division. Nuclear  
293 localization for AGO4 and AGO6 was previously observed in other tissues (Ye et al., 2012;  
294 Zheng et al., 2007). Perhaps more strikingly, mCherry-AGO9 displays nuclear localization in  
295 somatic tissues (Fig. 1H, Fig. 3G, Fig. 4G, Fig. S8) but appears to be also partially localized  
296 to the cytoplasm in the central and egg cells (Fig. 1H). Combined cytoplasmic and nuclear  
297 localizations of AGO9 were previously observed by immunolocalization in ovule primordia  
298 (Rodríguez-Leal et al., 2015; Zhao et al., 2018a). However, in those studies, AGO9 was  
299 found to accumulate in cytoplasmic foci which we could not observe with our reporter  
300 construct in the tissues examined. The mCh-AGO8 translational reporter, unlike other RdDM  
301 AGOs, was mainly localized to the cytoplasm of the egg cell (Fig. 1G). As discussed above,

302 this unusual intra-cellular localization for a Clade II AGO could result from AGO8 being a  
303 truncated, perhaps dominant-negative, protein.

304 One of the most intriguing intracellular localization patterns was that of GFP-AGO, found  
305 mainly localized to the nucleus. However, in some cells of the integument, in the egg cell and  
306 in the central cell, clear cytosolic localization was additionally observed, with the presence of  
307 cytoplasmic foci (Fig. 1K-L). Localization of GFP-AGO7 to cytoplasmic foci named “sRNA  
308 bodies” was previously observed in *Nicotiana benthamiana* leaves during transient  
309 overexpression of GFP-AGO7 (Jouannet et al., 2012). Nuclear GFP-AGO7 accumulation was  
310 not reported in this study. Several reasons could underpin this discrepancy, such as the  
311 difference in the promoter used (*p35S* versus cognate *pAGO7* promoters) and also,  
312 importantly, the tissues analyzed (mature leaves or roots *versus* reproductive tissue).  
313 Interestingly, retention of AGO7 in the nucleus, using an NLS signal-peptide fused to AGO7  
314 in stable *Arabidopsis* transformant, did not complement the so-called leaf zippy phenotype of  
315 *ago7* mutant (Hunter et al., 2003; Jouannet et al., 2012). This result shows that AGO7  
316 cytoplasmic localization is necessary for its function during leaf development. Similarly to  
317 AGO7, it was shown that nuclear retention of AGO1 does not allow complementation of the  
318 *ago1* mutant phenotype as AGO1 shuttling between the nucleus and the cytoplasm is required  
319 for its function in the *Arabidopsis* miRNA pathway (Bologna et al., 2018). The AGO7 zippy  
320 mutant phenotype relies on the compromised loading, by AGO7, and function of miR390.  
321 The fact that our construct rescues the *ago7* zippy leaf phenotype (Fig. S6) and displays both  
322 nuclear and cytoplasmic localization in the inspected tissues suggests that AGO7, similarly to  
323 AGO1, shuttles between both subcellular compartments in a manner possibly  
324 developmentally regulated. Nonetheless, nuclear AGO7 might have additional, as yet  
325 uncharacterized functions in reproductive tissues, as shown recently for nuclear AGO1 (Liu  
326 et al., 2018).

327 To conclude, we have generated full locus N-terminal tagged fluorescent constructs of all  
328 *Arabidopsis* AGOs under their native endogenous promoter. Though we have analyzed their  
329 expression pattern and intracellular localization in a study focused primarily on reproductive  
330 tissues, there is every reason to believe that these constructs and transgenic lines will be  
331 equally useful to study AGOs regulations in other developmental contexts or during stress.  
332 Fluorescent AGO-reporters have been sporadically described in *Arabidopsis*, yet they are  
333 often marred by biological incongruities such as the use of overexpression promoters or C-  
334 terminal fusions known to affect AGO functions. The uniform set of tools presented in this

335 study might help bridging this still significant gap across the plant RNA silencing  
336 community.

## 337 MATERIALS AND METHODS

### 338 PLANT MATERIAL AND GROWTH CONDITIONS

339 After three days at 4°C in the dark, seeds were germinated and grown on soil. Plants were  
340 grown under long days at 20-21°C (16h light/8h night). All plants were in Columbia (Col-0)  
341 accession. The mutants and lines described in this work correspond to the following: *ago1-36*  
342 (SALK\_087076,(Baumberger and Baulcombe, 2005)), *ago2-1* (salk\_003380,(Lobbes et al.,  
343 2006)), *ago3-3* (GABI-743B03,(Jullien et al., 2020)), *ago4-5* (WiscDsLox338A0, (Stroud et  
344 al., 2012)) , *ago5-1* (salk\_063806, (Katiyar-Agarwal et al., 2007)), *ago6-2* (salk\_031553,  
345 (Zheng et al., 2007)), *ago7-1* (salk\_037458, (Vazquez et al., 2004)), *ago8-1* (salk\_139894,  
346 (Takeda et al., 2008), *ago9-1* (salk\_127358, (Katiyar-Agarwal et al., 2007)) and *ago10-1*  
347 (SALK\_000457). The insertion lines were provided by The Nottingham *Arabidopsis* Stock  
348 Centre (NASC) (<http://arabidopsis.info/>). Pollen were germinated in Pollen growth medium  
349 at 21°C in the dark 5 hours to over-night (Hamamura et al., 2011).

### 350 MICROSCOPY

351 Fluorescence images were acquired using laser scanning confocal microscopy (Zeiss  
352 LSM780 or Leica SP5). Brightness was adjusted using ImageJ (<http://rsbweb.nih.gov/ij/>) and  
353 assembled using ImageJ or Adobe Illustrator.

### 354 PLASMID CONSTRUCTION AND TRANSFORMATION

355 All DNA fragments were amplified by PCR using the Phusion High-Fidelity DNA  
356 Polymerase (Thermo). Primer sequences can be found in Supplementary Table S1. All  
357 constructs were generated using Multisite Gateway technology (Invitrogen). *A. thaliana*  
358 transformation was carried out by the floral dip method (Clough and Bent, 1998). All  
359 plasmids were transformed into Col-0 and their respective mutants and for mCherry-AGO6  
360 also in LIG1-GFP marker line (Andreuzza et al., 2010). Six to nineteen transgenic lines (T1)  
361 were analysed and showed a consistent fluorescence expression pattern using a Leica  
362 epifluorescence microscope or a Leica SP5. One to three independent lines with single  
363 insertions, determined by segregation upon BASTA selection, were used for further detailed  
364 confocal analysis.

### 365 AUTHOR CONTRIBUTIONS

366 PEJ conceived the study. PEJ, NP and JAS generated the transgenic lines. PEJ and DMVB  
367 performed the imaging. DMVB and JAS tested the complementation. PEJ wrote the  
368 manuscript, which was further edited and amended by OV.

369 *ACKNOWLEDGEMENTS*

370 We would like to thank the following people for their help: Andre Imboden and Jasmine  
371 Sekulovski for support in plant growth, Nicolas G. Bologna for critical reading of the  
372 manuscript We would like to thank the ETH Scope M and Microscopy Imaging Center of the  
373 University of Bern.

374 *COMPETING INTERESTS*

375 The authors have no conflicts of interest to declare.

376 *FUNDING*

377 This project was supported by a core grant from ETH-Z attributed to OV. PEJ (Project  
378 329404) and NP (Project 299789) were supported by Marie Curie fellowships hosted in OV's  
379 laboratory at ETH-Z. PEJ, DMVB and JAS are supported by an SNF professorship grant  
380 (no.163946) attributed to PEJ.

381 *DATA AVAILABILITY*

382 Plasmids and lines used in this study will be made available to the community.

383 *SUPPLEMENTARY INFORMATION*

384 Additional Supporting Information may be found in the online version of this article

385 REFERENCES

- 386 **Andreuzza, S., Li, J., Guitton, A.-E., Faure, J.-E., Casanova, S., Park, J.-S., Choi, Y.,**  
387 **Chen, Z. and Berger, F.** (2010). DNA LIGASE I exerts a maternal effect on seed  
388 development in *Arabidopsis thaliana*. *Development* **137**, 73–81.
- 389 **Baumberger, N. and Baulcombe, D. C.** (2005). *Arabidopsis* ARGONAUTE1 is an RNA  
390 Slicer that selectively recruits microRNAs and short interfering RNAs. *Proc. Natl. Acad.*  
391 *Sci. U. S. A.* **102**, 11928–11933.
- 392 **Belmonte, M. F., Kirkbride, R. C., Stone, S. L., Pelletier, J. M., Bui, A. Q., Yeung, E. C.,**  
393 **Hashimoto, M., Fei, J., Harada, C. M., Munoz, M. D., et al.** (2013). Comprehensive  
394 developmental profiles of gene activity in regions and subregions of the *Arabidopsis*  
395 seed. *Proc. Natl. Acad. Sci.* **110**, E435–E444.
- 396 **Bologna, N. G. and Voinnet, O.** (2014). The diversity, biogenesis, and activities of  
397 endogenous silencing small RNAs in *Arabidopsis*. *Annu. Rev. Plant Biol.* **65**, 473–503.
- 398 **Bologna, N. G., Iselin, R., Abriata, L. A., Sarazin, A., Pumplin, N., Jay, F., Grentzinger,**  
399 **T., Dal Peraro, M. and Voinnet, O.** (2018). Nucleo-cytosolic Shuttling of  
400 ARGONAUTE1 Prompts a Revised Model of the Plant MicroRNA Pathway. *Mol. Cell*  
401 **69**, 709-719.e5.
- 402 **Borges, F. and Martienssen, R. A.** (2015). The expanding world of small RNAs in plants.  
403 *Nat. Rev. Mol. Cell Biol.* **16**, 727–741.
- 404 **Borges, F., Pereira, P. a, Slotkin, R. K., Martienssen, R. a and Becker, J. D.** (2011).  
405 MicroRNA activity in the *Arabidopsis* male germline. *J. Exp. Bot.* **62**, 1611–20.
- 406 **Borges, F., Parent, J. S., Van Ex, F., Wolff, P., Martínez, G., Köhler, C. and**  
407 **Martienssen, R. A.** (2018). Transposon-derived small RNAs triggered by miR845  
408 mediate genome dosage response in *Arabidopsis*. *Nat. Genet.* **50**, 186–192.
- 409 **Bouyer, D., Kramdi, A., Kassam, M., Heese, M., Schnittger, A., Roudier, F. and Colot,**  
410 **V.** (2017). DNA methylation dynamics during early plant life. *Genome Biol.* **18**, 179.
- 411 **Carbonell, A., Fahlgren, N., Garcia-Ruiz, H., Gilbert, K. B., Montgomery, T. a, Nguyen,**  
412 **T., Cuperus, J. T. and Carrington, J. C.** (2012). Functional analysis of three



- 413 Arabidopsis ARGONAUTES using slicer-defective mutants. *Plant Cell* **24**, 3613–29.
- 414 **Castel, S. E. and Martienssen, R. A.** (2013). RNA interference in the nucleus: Roles for  
415 small RNAs in transcription, epigenetics and beyond. *Nat. Rev. Genet.* **14**, 100–112.
- 416 **Clough, S. J. and Bent, A. F.** (1998). Floral dip: A simplified method for Agrobacterium-  
417 mediated transformation of *Arabidopsis thaliana*. *Plant J.* **16**, 735–743.
- 418 **Conine, C. C., Sun, F., Song, L., Rivera-Pérez, J. A. and Rando, O. J.** (2018). Small  
419 RNAs Gained during Epididymal Transit of Sperm Are Essential for Embryonic  
420 Development in Mice. *Dev. Cell* **46**, 470-480.e3.
- 421 **Cranfill, P. J., Sell, B. R., Baird, M. A., Allen, J. R., Lavagnino, Z., De Gruiter, H. M.,  
422 Kremers, G. J., Davidson, M. W., Ustione, A. and Piston, D. W.** (2016). Quantitative  
423 assessment of fluorescent proteins. *Nat. Methods* **13**, 557–562.
- 424 **Du, F., Gong, W., Boscá, S., Tucker, M., Vaucheret, H. and Laux, T.** (2019). Dose-  
425 Dependent AGO1-Mediated Inhibition of the miRNA165/166 Pathway Modulates Stem  
426 Cell Maintenance in Arabidopsis Shoot Apical Meristem. *Plant Commun.* 100002.
- 427 **Ebhardt, H. A., Fedynak, A. and Fahlman, R. P.** (2010). Naturally occurring variations in  
428 sequence length creates microRNA isoforms that differ in argonaute effector complex  
429 specificity. *Silence* **1**, 1–6.
- 430 **Fang, X. and Qi, Y.** (2015). Rnai in plants: An argonaute-centered view. *Plant Cell* **28**, 272–  
431 285.
- 432 **Gehring, M., Bubb, K. L. and Henikoff, S.** (2009). Extensive demethylation of repetitive  
433 elements during seed development underlies gene imprinting. *Science (80-. )*. **324**,  
434 1447–51.
- 435 **Gutzat, R., Rembart, K., Nussbaumer, T., Pisupati, R., Hofmann, F., Bradamante, G.,  
436 Daubel, N., Gaidora, A., Lettner, N., Donà, M., et al.** (2018). Stage-specific  
437 transcriptomes and DNA methylomes indicate an early and transient loss of transposon  
438 control in Arabidopsis shoot stem cells. *bioRxiv*.
- 439 **Hamamura, Y., Saito, C., Awai, C., Kurihara, D., Miyawaki, A., Nakagawa, T.,  
440 Kanaoka, M. M., Sasaki, N., Nakano, A., Berger, F., et al.** (2011). Live-cell imaging  
441 reveals the dynamics of two sperm cells during double fertilization in Arabidopsis



- 442 *thaliana*. *Curr. Biol.* **21**, 497–502.
- 443 **Havecker, E. R., Wallbridge, L. M., Hardcastle, T. J., Bush, M. S., Kelly, K. A., Dunn,**  
444 **R. M., Schwach, F., Doonan, J. H. and Baulcombe, D. C.** (2010). The Arabidopsis  
445 RNA-directed DNA methylation argonautes functionally diverge based on their  
446 expression and interaction with target loci. *Plant Cell* **22**, 321–34.
- 447 **He, J., Xu, M., Willmann, M. R., McCormick, K., Hu, T., Yang, L., Starker, C. G.,**  
448 **Voytas, D. F., Meyers, B. C. and Poethig, R. S.** (2018). Threshold-dependent  
449 repression of SPL gene expression by miR156/miR157 controls vegetative phase change  
450 in Arabidopsis thaliana. *PLoS Genet.* **14**, 1–28.
- 451 **Hernández-Lagana, E., Rodríguez-Leal, D., Lúa, J. and Vielle-Calzada, J. P.** (2016). A  
452 multigenic network of ARGONAUTE4 clade members controls early megaspore  
453 formation in arabidopsis. *Genetics* **204**, 1045–1056.
- 454 **Hsieh, T. T.-F., Ibarra, C. A., Silva, P., Zemach, A., Eshed-Williams, L., Fischer, R. L.**  
455 **and Zilberman, D.** (2009). Genome-wide demethylation of Arabidopsis endosperm.  
456 *Science (80-. )*. **324**, 1451–1454.
- 457 **Hunter, C., Sun, H. and Poethig, R. S.** (2003). The Arabidopsis Heterochronic Gene ZIPPY  
458 Is an ARGONAUTE Family Member. *Curr. Biol.* **13**, 1734–1739.
- 459 **Jouannet, V., Moreno, A. B., Elmayan, T., Vaucheret, H., Crespi, M. D. and Maizel, A.**  
460 (2012). Cytoplasmic Arabidopsis AGO7 accumulates in membrane-associated siRNA  
461 bodies and is required for ta-siRNA biogenesis. *EMBO J.* **31**, 1704–1713.
- 462 **Jullien, P. E., Susaki, D., Yelagandula, R., Higashiyama, T. and Berger, F.** (2012). DNA  
463 methylation dynamics during sexual reproduction in Arabidopsis thaliana. *Curr. Biol.*  
464 **22**, 1825–1830.
- 465 **Jullien, P. E., Grob, S., Marchais, A., Pumplin, N., Chevalier, C., Bonnet, D. M. , Otto,**  
466 **C., Schott, G. and Voinnet, O.** (2020). Functional characterization of Arabidopsis  
467 ARGONAUTE 3 in reproductive tissue. *Plant J.* Accepted Author Manuscript.  
468 doi:10.1111/tpj.14868.
- 469 **Katiyar-Agarwal, S., Gao, S., Vivian-Smith, A. and Jin, H.** (2007). A novel class of  
470 bacteria-induced small RNAs in Arabidopsis. *Genes Dev.* **21**, 3123–3134.

- 471 **Kawakatsu, T., Nery, J. R., Castanon, R. and Ecker, J. R.** (2017). Dynamic DNA  
472 methylation reconfiguration during seed development and germination. *Genome Biol.*  
473 **18**, 171.
- 474 **Landgraf, D., Okumus, B., Chien, P., Baker, T. A. and Paulsson, J.** (2012). Segregation  
475 of molecules at cell division reveals native protein localization. *Nat. Methods* **9**, 480–  
476 482.
- 477 **Liu, C., Xin, Y., Xu, L., Cai, Z., Xue, Y., Liu, Y., Xie, D., Liu, Y. and Qi, Y.** (2018).  
478 Arabidopsis ARGONAUTE 1 Binds Chromatin to Promote Gene Transcription in  
479 Response to Hormones and Stresses. *Dev. Cell* **44**, 348-361.e7.
- 480 **Lobbes, D., Rallapalli, G., Schmidt, D. D., Martin, C. and Clarke, J.** (2006). SERRATE:  
481 a new player on the plant microRNA scene. *EMBO Rep.* **7**, 1052–8.
- 482 **Lynn, K., Fernandez, A., Aida, M., Sedbrook, J., Tasaka, M., Masson, P. and Barton,**  
483 **M. K.** (1999). The PINHEAD/ZWILLE gene acts pleiotropically in Arabidopsis  
484 development and has overlapping functions with the ARGONAUTE1 gene.  
485 *Development* **126**, 469–481.
- 486 **Mallory, A. and Vaucheret, H.** (2010). Form, function, and regulation of ARGONAUTE  
487 proteins. *Plant Cell* **22**, 3879–89.
- 488 **Marchais, A., Chevalier, C. and Voinnet, O.** (2019). Extensive profiling in Arabidopsis  
489 reveals abundant polysome-associated 24-nt small RNAs including AGO5-dependent  
490 pseudogene-derived siRNAs. *Rna* **25**, 1098–1117.
- 491 **Martinez, G., Wolff, P., Wang, Z., Moreno-Romero, J., Santos-González, J., Conze, L.**  
492 **L., Defraia, C., Slotkin, R. K. and Köhler, C.** (2018). Paternal easiRNAs regulate  
493 parental genome dosage in Arabidopsis. *Nat. Genet.* **50**, 193–198.
- 494 **Matzke, M. A. and Mosher, R. A.** (2014). RNA-directed DNA methylation: An epigenetic  
495 pathway of increasing complexity. *Nat. Rev. Genet.* **15**, 394–408.
- 496 **Meinke, D. W.** (2020). Genome-wide identification of EMBRYO-DEFECTIVE (EMB)  
497 genes required for growth and development in Arabidopsis. *New Phytol.* **226**, 306–325.
- 498 **Mosher, R. A. and Melnyk, C. W.** (2010). siRNAs and DNA methylation: seedy  
499 epigenetics. *Trends Plant Sci.* **15**, 204–210.

- 500 **Moussian, B., Schoof, H., Haecker, A., Ju, G. and Laux, T.** (1998). Role of the ZWILLE  
501 gene in the regulation of central shoot meristem cell fate during Arabidopsis  
502 embryogenesis. *Curr. Opin. Plant Biol.* **1**, 188.
- 503 **Nodine, M. D. and Bartel, D. P.** (2010). MicroRNAs prevent precocious gene expression  
504 and enable pattern formation during plant embryogenesis. *Genes Dev.* **24**, 2678–92.
- 505 **Oliver, C., Santos, J. L. and Pradillo, M.** (2014). On the role of some ARGONAUTE  
506 proteins in meiosis and DNA repair in Arabidopsis thaliana. *Front. Plant Sci.* **5**, 177.
- 507 **Olmedo-Monfil, V., Durán-Figueroa, N., Arteaga-Vázquez, M., Demesa-Arévalo, E.,**  
508 **Autran, D., Grimanelli, D., Slotkin, R. K., Martienssen, R. A. and Vielle-Calzada,**  
509 **J.-P.** (2010). Control of female gamete formation by a small RNA pathway in  
510 Arabidopsis. *Nature* **464**, 628–632.
- 511 **Rodríguez-Leal, D., León-Martínez, G., Abad-Vivero, U. and Vielle-Calzada, J. P.**  
512 (2015). Natural variation in epigenetic pathways affects the specification of female  
513 gamete precursors in arabidopsis. *Plant Cell* **27**, 1034–1045.
- 514 **Roussin-Léveillé, C., Silva-Martins, G. and Moffett, P.** (2020). ARGONAUTE5  
515 Represses Age-Dependent Induction of Flowering through Physical and Functional  
516 Interaction with miR156 in Arabidopsis. *Plant Cell Physiol.* **61**, 957–966.
- 517 **Schröder, J. A. and Jullien, P. E.** (2019). The Diversity of Plant Small RNAs Silencing  
518 Mechanisms. *Chim. Int. J. Chem.* **73**, 362–367.
- 519 **Seefried, W. F., Willmann, M. R., Clausen, R. L. and Jenik, P. D.** (2014). Global  
520 regulation of embryonic patterning in arabidopsis by MicroRNAs. *Plant Physiol.* **165**,  
521 670–687.
- 522 **Sharma, U., Sun, F., Conine, C. C., Reichhoff, B., Kukreja, S., Herzog, V. A., Ameres, S.**  
523 **L. and Rando, O. J.** (2018). Small RNAs Are Trafficked from the Epididymis to  
524 Developing Mammalian Sperm. *Dev. Cell* **46**, 481-494.e6.
- 525 **Slotkin, R. K., Vaughn, M., Borges, F., Tanurdzic, M., Becker, J. D. J. D., Feijo, J. A.,**  
526 **Martienssen, R. A., Tanurdžić, M., Feijó, J. A., Feijo, A., et al.** (2009). Epigenetic  
527 reprogramming and small RNA silencing of transposable elements in pollen. *Cell* **136**,  
528 461–472.

- 529 **Sprunck, S., Urban, M., Strieder, N., Lindemeier, M., Bleckmann, A., Evers, M.,**  
530 **Hackenberg, T., Möhle, C., Dresselhaus, T. and Engelmann, J. C.** (2019).  
531 Elucidating small RNA pathways in *Arabidopsis thaliana* egg cells. *bioRxiv*.
- 532 **Stroud, H., Greenberg, M. V. C., Feng, S., Bernatavichute, Y. V. and Jacobsen, S. E.**  
533 (2012). Resource Comprehensive Analysis of Silencing Mutants Reveals Complex  
534 Regulation of the *Arabidopsis* Methylome. *Cell* **152**, 352–364.
- 535 **Takeda, A., Iwasaki, S., Watanabe, T., Utsumi, M. and Watanabe, Y.** (2008). The  
536 mechanism selecting the guide strand from small RNA duplexes is different among  
537 Argonaute proteins. *Plant Cell Physiol.* **49**, 493–500.
- 538 **Tucker, M. R., Hinze, A., Tucker, E. J., Takada, S., Jürgens, G. and Laux, T.** (2008).  
539 Vascular signalling mediated by ZWILLE potentiates WUSCHEL function during shoot  
540 meristem stem cell development in the *Arabidopsis* embryo. *Development* **135**, 2839–  
541 2843.
- 542 **Tucker, M. R., Okada, T., Hu, Y., Scholefield, A., Taylor, J. M. and Koltunow, A. M. G.**  
543 (2012). Somatic small RNA pathways promote the mitotic events of megagametogenesis  
544 during female reproductive development in *Arabidopsis*. *Development* **139**, 1399–1404.
- 545 **Van Ex, F., Jacob, Y. and Martienssen, R. a** (2011). Multiple roles for small RNAs during  
546 plant reproduction. *Curr. Opin. Plant Biol.* 1–6.
- 547 **Vazquez, F., Gascioli, V., Créte, P. and Vaucheret, H.** (2004). The Nuclear dsRNA  
548 Binding Protein HYL1 Is Required for MicroRNA Accumulation and Plant  
549 Development, but Not Posttranscriptional Transgene Silencing. *Curr. Biol.* **14**, 346–351.
- 550 **Weick, E. M. and Miska, E. A.** (2014). piRNAs: From biogenesis to function. *Dev.* **141**,  
551 3458–3471.
- 552 **Willmann, M. R., Mehalick, A. J., Packer, R. L. and Jenik, P. D.** (2011). MicroRNAs  
553 regulate the timing of embryo maturation in *Arabidopsis*. *Plant Physiol.* **155**, 1871–  
554 1884.
- 555 **Wu, G., Park, M. Y., Conway, S. R., Wang, J. W., Weigel, D. and Poethig, R. S.** (2009).  
556 The Sequential Action of miR156 and miR172 Regulates Developmental Timing in  
557 *Arabidopsis*. *Cell* **138**, 750–759.

- 558 **Wuest, S. E., Vijverberg, K., Schmidt, A., Weiss, M., Gheyselinck, J., Lohr, M.,**  
559 **Wellmer, F., Rahnenführer, J., von Mering, C. and Grossniklaus, U.** (2010).  
560 Arabidopsis Female Gametophyte Gene Expression Map Reveals Similarities between  
561 Plant and Animal Gametes. *Curr. Biol.* **20**, 506–512.
- 562 **Ye, R., Wang, W., Iki, T., Liu, C., Wu, Y., Ishikawa, M., Zhou, X. and Qi, Y.** (2012).  
563 Cytoplasmic Assembly and Selective Nuclear Import of Arabidopsis  
564 ARGONAUTE4/siRNA Complexes. *Mol. Cell* **46**, 859–870.
- 565 **Yuan, S., Schuster, A., Tang, C., Yu, T., Ortogero, N., Bao, J., Zheng, H. and Yan, W.**  
566 (2016). Sperm-borne miRNAs and endo-siRNAs are important for fertilization and  
567 preimplantation embryonic development. *Dev.* **143**, 635–647.
- 568 **Zhang, H., Xia, R., Meyers, B. C. and Walbot, V.** (2015). Evolution, functions, and  
569 mysteries of plant ARGONAUTE proteins. *Curr. Opin. Plant Biol.* **27**, 84–90.
- 570 **Zhao, L., Cai, H., Su, Z., Wang, L., Huang, X., Zhang, M., Chen, P., Dai, X., Zhao, H.,**  
571 **Palanivelu, R., et al.** (2018a). KLU suppresses megasporocyte cell fate through SWR1-  
572 mediated activation of WRKY28 expression in Arabidopsis. *Proc. Natl. Acad. Sci. U. S.*  
573 *A.* **115**, E526–E535.
- 574 **Zhao, Y., Wang, S., Wu, W., Li, L., Jiang, T. and Zheng, B.** (2018b). Clearance of  
575 maternal barriers by paternal miR159 to initiate endosperm nuclear division in  
576 Arabidopsis. *Nat. Commun.* **9**, 5011.
- 577 **Zheng, X., Zhu, J., Kapoor, A. and Zhu, J.-K.** (2007). Role of Arabidopsis AGO6 in  
578 siRNA accumulation, DNA methylation and transcriptional gene silencing. *EMBO J.* **26**,  
579 1691–1701.
- 580
- 581

## 582 FIGURE LEGENDS

583

584 **Fig. 1.** AGOs accumulation in the mature female gametophyte. (A) schematic representation  
585 of a mature female gametophyte of *Arabidopsis thaliana* illustrating the three major cell  
586 types: the central cell (cc) in green, the egg cell (ec) in orange, the synergides (syn) in blue.  
587 The mature female gametophyte is surrounded by maternal sporophytic tissue represented in  
588 grey, including the inner integument (ii), outer integument (oi) and the nucellus (nuc). (B-K)  
589 Confocal images representing the expression of the 10 *Arabidopsis* AGOs in mature female  
590 gametophytes: mCherry-AGO1 (B), mCherry-AGO5 (C), GFP-AGO10 (D), mCherry-AGO4  
591 (E), mCherry-AGO6 (F), mCherry-AGO8 (G), mCherry-AGO9 (H), mCherry-AGO2 (I),  
592 mCherry-AGO3 (J) and GFP-AGO7 (K). (L) Confocal image of the intra-cellular localization  
593 of GFP-AGO7 in the egg cell and central cell. Scale bars represent 10µm.

594

595 **Fig. 2.** AGOs accumulation in the pollen. (A-H) AGOs in the mature male gametophyte. (A)  
596 Schematic representation of a mature pollen grain of *Arabidopsis thaliana* illustrating the two  
597 major cell types: the vegetative cell (v) and the two sperm cells (s). (B-H) Confocal images  
598 representing the expression of seven *Arabidopsis* AGOs accumulating in the pollen grain:  
599 mCherry-AGO1 (B), mCherry-AGO5 (C), mCherry-AGO4 (D), mCherry-AGO6 (E),  
600 mCherry-AGO9 (F), mCherry-AGO2 (G) and GFP-AGO7 (H). (I-P) AGO accumulation in  
601 germinating pollen tube. (I) Schematic representation of a growing pollen tube of  
602 *Arabidopsis thaliana* illustrating the two sperm cells (s). (J-P) Confocal images of the seven  
603 *Arabidopsis* AGOs in germinated pollen grain: mCherry-AGO1 (B), mCherry-AGO5 (C),  
604 mCherry-AGO4 (D), mCherry-AGO6 (E), mCherry-AGO9 (F), mCherry-AGO2 (G) and  
605 GFP-AGO7 (H). Scale bars represent 5 µm.

606

607 **Fig. 3.** AGOs accumulation in the developing seed. (A-I) Confocal images of the height  
608 *Arabidopsis* AGOs expressed in the developing seeds 2 days-after-pollination (DAP):  
609 mCherry-AGO1 (A), mCherry-AGO5 (B), GFP-AGO10 (C), mCherry-AGO4 (D-E),  
610 mCherry-AGO6 (F), mCherry-AGO9 (G), mCherry-AGO3 (H) and GFP-AGO7 (I). Scale  
611 bars represent 10 µm. Abbreviation: emb (embryo), endo (endosperm), inner integument (ii),  
612 outer integuments (oi), Chalazal seed coat (czsc).

613

614 **Fig. 4.** AGOs accumulation in the heart-stage embryo. (A) A simplified representation of a  
615 heart-stage embryo of *Arabidopsis thaliana* illustrating the different cell types. (B-H)  
616 Confocal images of the seven Arabidopsis AGOs accumulating in the heart-stage embryo:  
617 mCherry-AGO1 (B), mCherry-AGO5 (C), GFP-AGO10 (D), mCherry-AGO4 (E), mCherry-  
618 AGO6 (F), mCherry-AGO9 (G), and GFP-AGO7 (H). Scale bars represent 10  $\mu$ m.

619

620 **Fig. S1.** Schematic representation of the constructs used in this study. The different features  
621 are represented by arrows: promoter (purple), UTRs (yellow), fluorescent protein (red), exon  
622 (green) and additional annotations (blue).

623

624 **Fig. S2.** Complementation of the *ago1-36* mutant *Arabidopsis* by *pAGO1:mCherry-AGO1*.  
625 Representative pictures showing the rescue of the string developmental phenotype in Col-0  
626 (A) and mCh1 #9 *ago1-36/-*(C) compared to *ago1-36/-*. scale bar represents 1mm.

627

628 **Fig. S3.** Complementation of *ago4-5* mutant by *pAGO4:mCherry-AGO4*. qPCR showing the  
629 absence of *AtSN1* ectopic expression in rosette leaves of seven independent lines expressing  
630 the construct *pAGO4:mCherry-AGO4* (*mCh4*) in *ago4-5* background compared to Col-0 and  
631 *ago4-5*. Actin2 was used as endogenous control. p indicates the p value obtained by a  
632 Student`s T-Test.

633

634 **Fig. S4.** Complementation of *ago5-1* mutant *Arabidopsis* by *pAGO5:mCherry-AGO5*. (A)  
635 Representative pictures of the early flowering phenotype of *ago5-1/-* compared to Col-0 and  
636 mCh5 #29 *ago5-1/-*. (B) Quantification of *ago5-1/-* flowering phenotype in *ago5-1/-* (n=27),  
637 Col-0 (n=26) and mCh5#29 *ago5-1/-* (n=27). p indicates the p value obtained by a Student`s  
638 T-Test.

639



640 **Fig. S5.** Complementation of *ago6-2* mutant by *pAGO6:mCherry-AGO6*. qPCR showing the  
641 absence of *AtSN1* ectopic expression in rosette leaves of seven independent lines expressing  
642 the construct *pAGO6:mCherry-AGO6* (*mCh4*) in *ago6-2* background compared to Col-0 and  
643 *ago6-2*. Actin2 was used as endogenous control. p indicates the p value obtained by a  
644 Student`s T-Test.

645

646 **Fig. S6.** Complementation of *ago7-1* mutant *Arabidopsis* by *pAGO7:GFP-AGO7*. Illustrative  
647 pictures of the leaf “zippy” phenotype of *ago7-1/-* (B) compared to Col-0 (A) and GFP-  
648 *AGO7 ago7-1/-* (C). n= 7

649

650 **Fig. S7.** Additional pictures of *pAGO10:GFP-AGO10*. (A-B) Picture of the accumulation in  
651 ovules of GFP-AGO10 in the vascular tissue of the funiculus (funi) and at the vascular  
652 termination of the chalazal seed coat (czsc). Scale bars represent 10  $\mu$ m.

653

654 **Fig. S8.** Additional pictures of *pAGO9:mCh-AGO9*. (A) Pictures of the expression in ovules  
655 of mCherry-AGO9 in the funiculus (funi) and in the chalazal seed coat (czsc). (B-C)  
656 Accumulation of mCherry-AGO9 in developing seeds, in early embryo and endosperm, 17  
657 hours after pollination (HAP) (B) or 24 HAP (C). Scale bars represent 10  $\mu$ m.

658

659 **Fig. S9.** *Arabidopsis* AGO transcription patterns extracted from microarray data of LCM-  
660 dissected female gametophytes (Wuest et al, 2010) confirming the general enrichment of  
661 AGO transcripts in the egg cell (EC) compared to central cell (CC) or synergids (Syn). (A)  
662 Violin plot representing the general enrichment of AGO transcripts in the EC. (B) AGOs  
663 individual expression boxplot in the different cell types. p values of a Wilcoxon test are  
664 indicated.

665

666 **Fig. S10.** *Arabidopsis* AGO transcription patterns extracted from microarray data of LCM-  
667 dissected seeds at the pre-globular stage (Belmonte et al., 2013) confirming the general  
668 enrichment of AGO transcripts in the embryo compared to the peripheral endosperm. (A)

669 Violin plot representing the general enrichment of AGO transcripts in the embryo. (B) AGOs  
670 individual expression boxplot in the different cell types. p values of a Wilcoxon test are  
671 indicated. *AGO6* and *AGO8* probes are not present in these data.

672

673 **Fig S11.** Summary table of AGO's expression pattern in reproductive tissues.

674

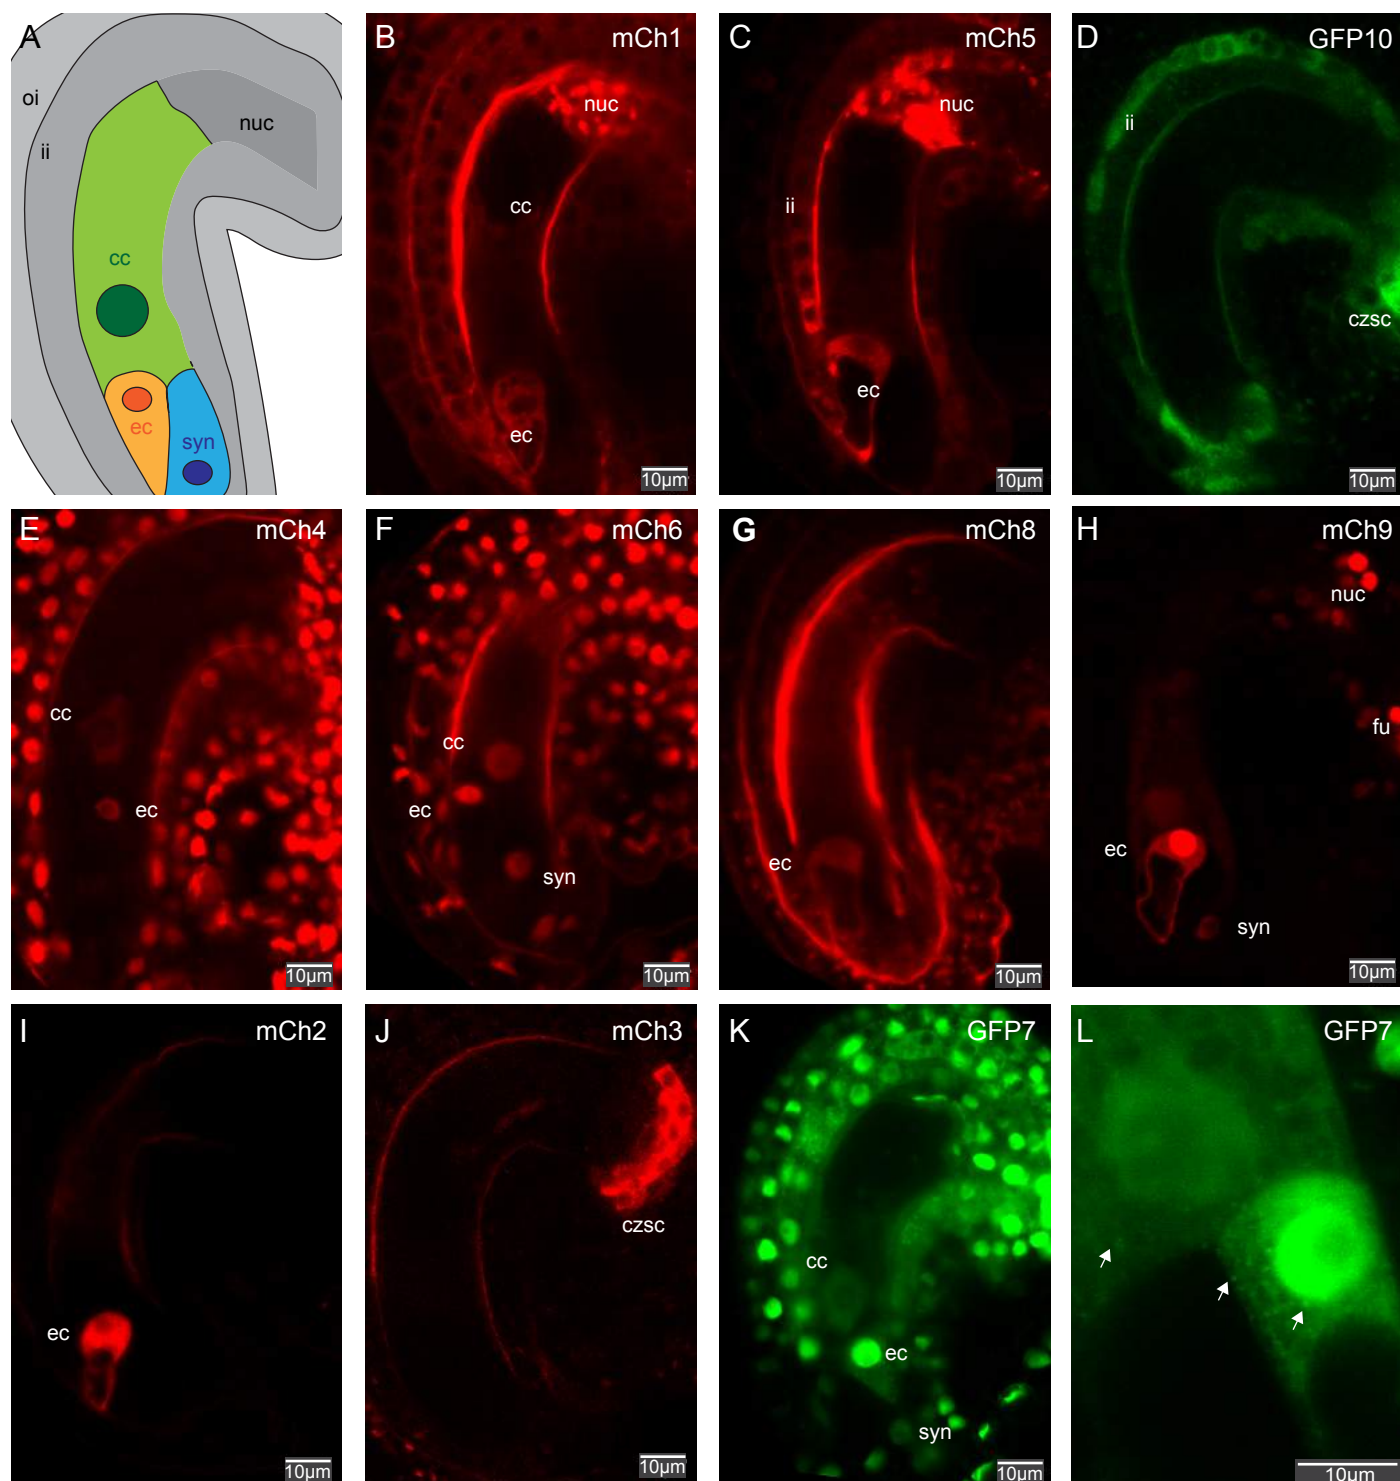

Fig. 1. Argonaute expression in the mature female gametophyte. (A) schematic representation of a mature female gametophyte of *Arabidopsis thaliana* illustrating the three major cell type: the central cell (cc) in green, the egg cell (ec) in orange, the synergides (syn) in blue. The mature female gametophyte is surrounded by maternal sporophytic tissue represented in grey including the inner integument (ii), outer integument (oi) and the nucellus (nuc). (B-K) Confocal images representing the expression of the 10 *Arabidopsis* AGOs in mature female gametophyte: mCherry-AGO1 (B), mCherry-AGO5 (C), GFP-AGO10 (D), mCherry-AGO4 (E), mCherry-AGO6 (F), mCherry-AGO8 (G), mCherry-AGO9 (H), mCherry-AGO2 (I), mCherry-AGO3 (J) and GFP-AGO7 (K). (L) Confocal image illustrating the intra-cellular localization of GFP-AGO7 in the egg cell and central cell. Scale bars represent 10 μm.

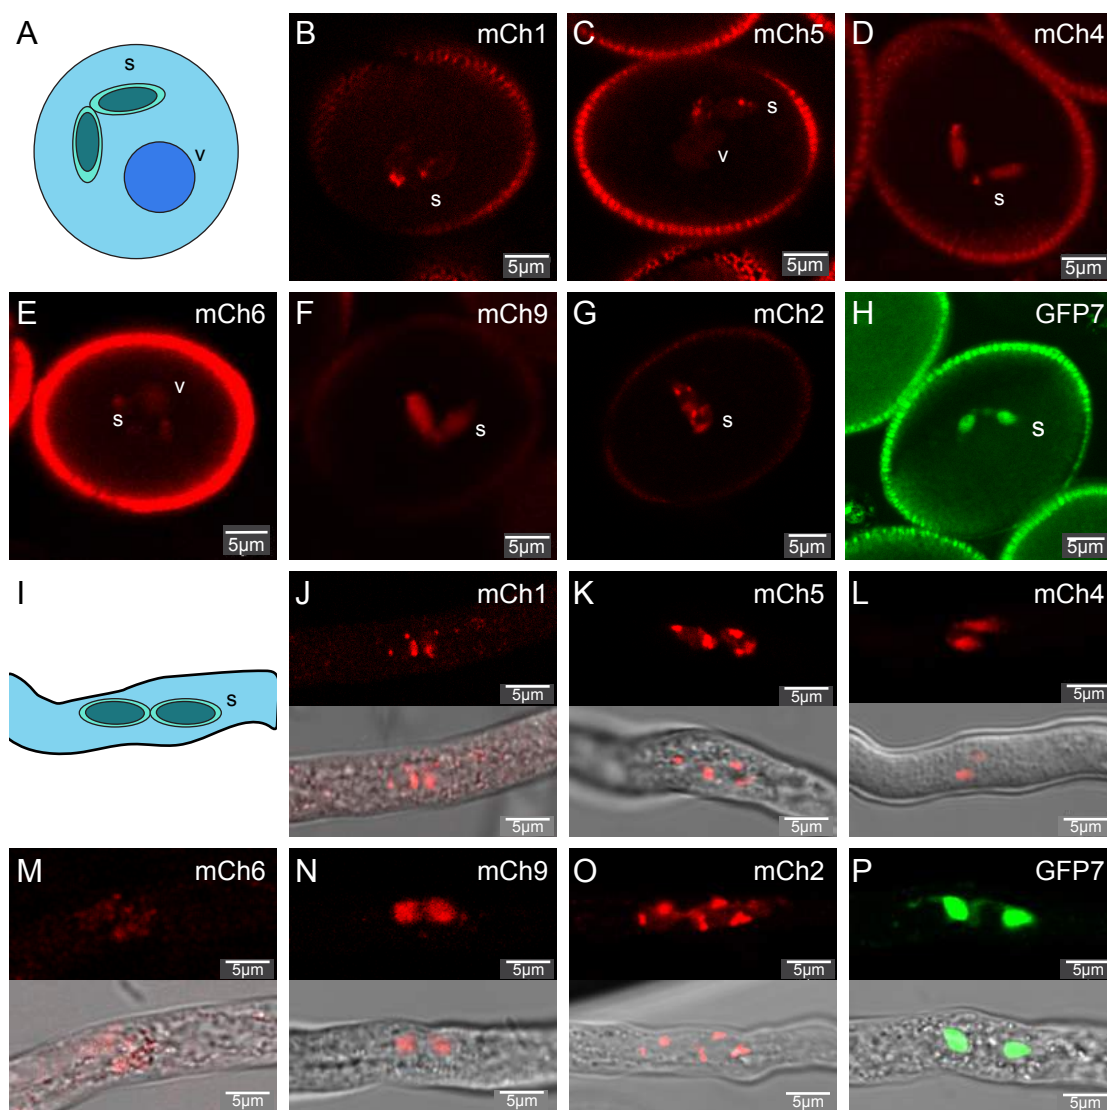

Fig. 2. Argonaute expression in pollen. (A-H) AGOs in the mature male gametophyte. (A) Schematic representation of a mature pollen grain of *Arabidopsis thaliana* illustrating the two major cell type: the vegetative cell (v) and the two sperm cells (s). (B-H) Confocal images representing the expression of 7 *Arabidopsis* AGOs expressed in the pollen grain: mCherry-AGO1 (B), mCherry-AGO5 (C), mCherry-AGO4 (D), mCherry-AGO6 (E), mCherry-AGO9 (F), mCherry-AGO2 (G) and GFP-AGO7 (H). (I-P) Argonaute expression in germinating pollen tube. (I) Schematic representation of a growing pollen tube of *Arabidopsis thaliana* illustrating the two sperm cells (s). (J-P) Confocal images representing the 7 *Arabidopsis* AGOs expressed in in germinated pollen grain: mCherry-AGO1 (B), mCherry-AGO5 (C), mCherry-AGO4 (D), mCherry-AGO6 (E), mCherry-AGO9 (F), mCherry-AGO2 (G) and GFP-AGO7 (H). Scale bars represent 5 μm.

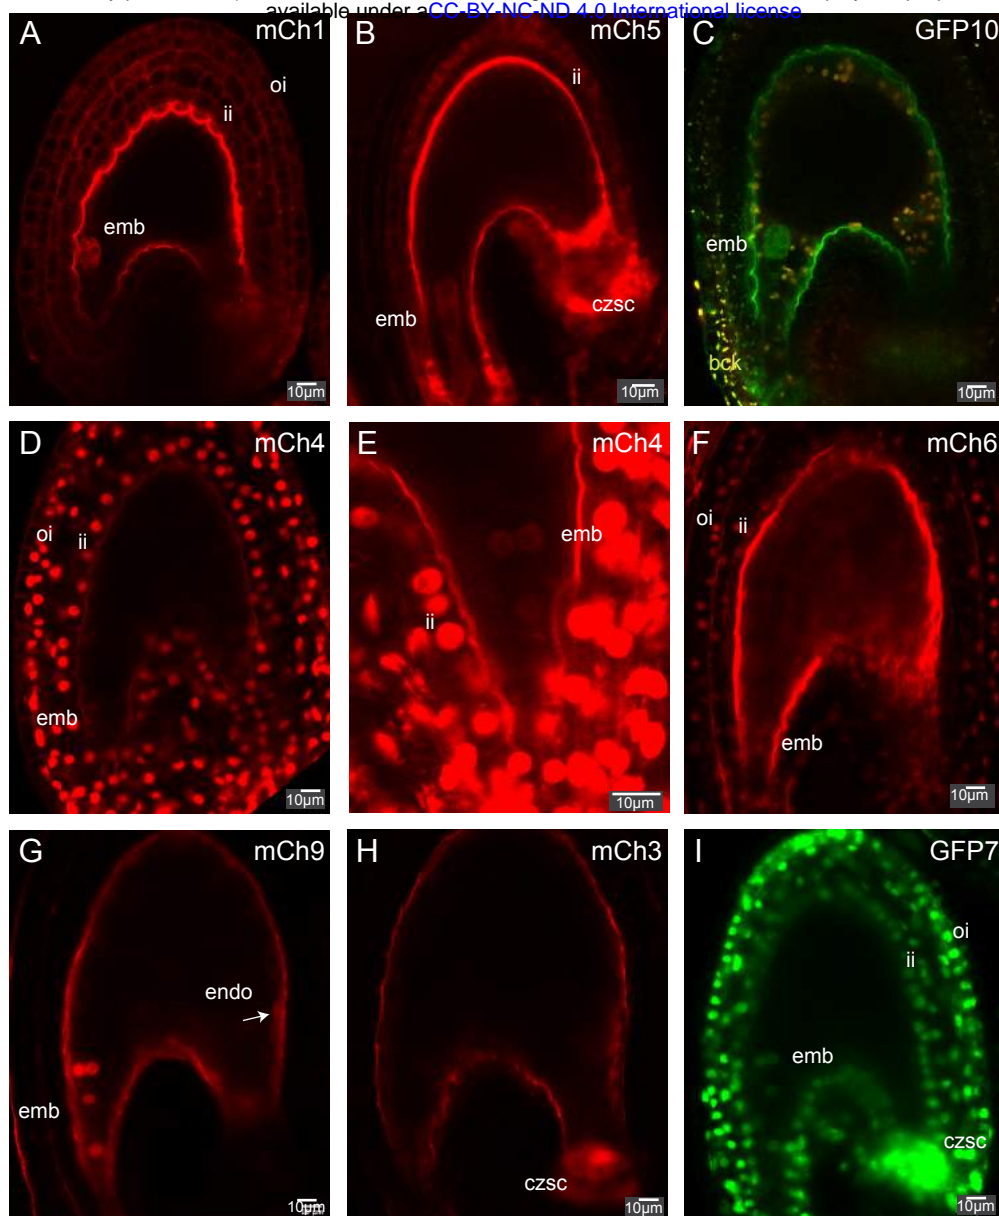

Fig. 3. Argonaute expression in developing seed. (A-I) Confocal images representing Arabidopsis AGOs expressed in the developing seeds at 2 day after pollination: mCherry-AGO1 (A), mCherry-AGO5 (B), GFP-AGO10 (C), mCherry-AGO4 (D-E), mCherry-AGO6 (F), mCherry-AGO9 (G), mCherry-AGO3 (H) and GFP-AGO7 (I). Scale bars represent 10 μm. Abbreviation: emb (embryo), endo (endosperm), inner integument (ii), outer integuments (oi), Chalazal seed coat (czsc).



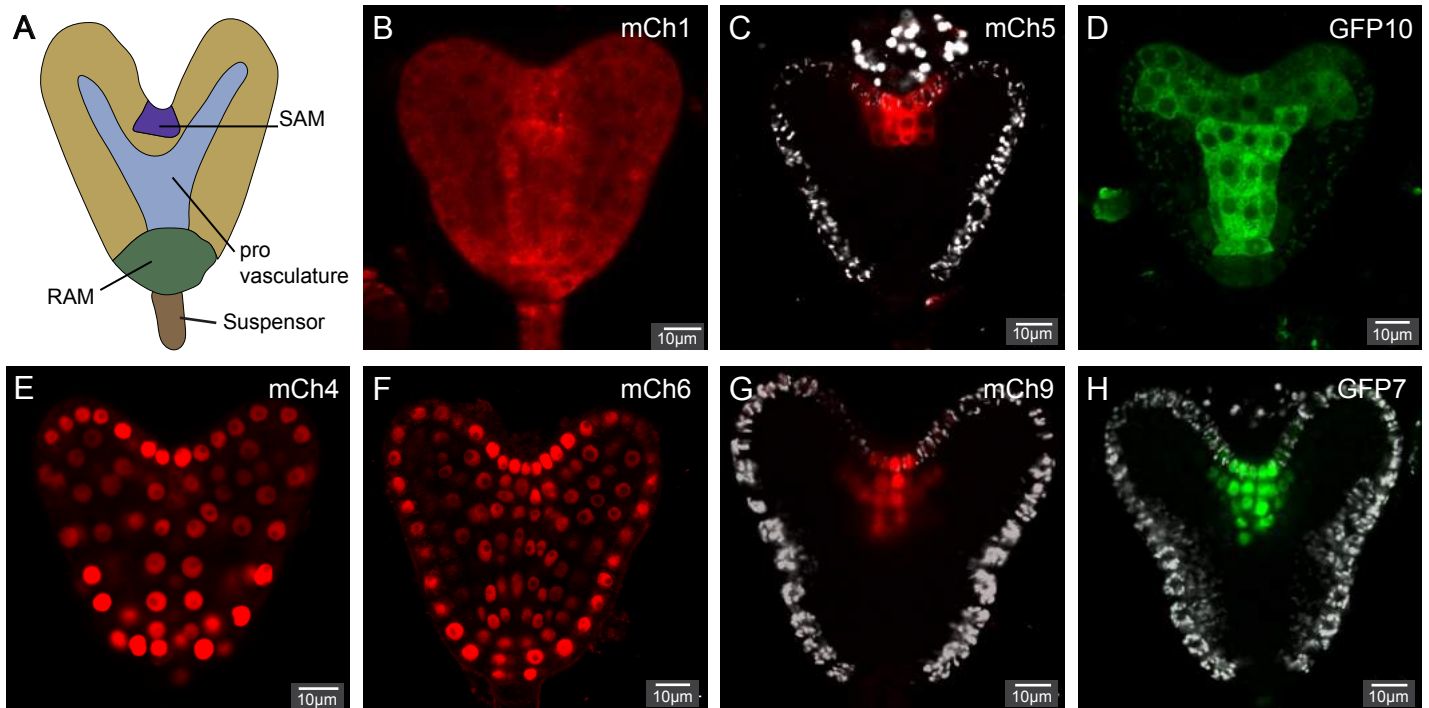

Fig. 4. Argonaute expression in heart stage embryo. (A) A simplified representation of a heart stage embryo illustrating the different cell types. (B-H) Confocal images representing the 7 Arabidopsis AGOs expressed in heart stage embryo: mCherry-AGO1 (B), mCherry-AGO5 (C), GFP-AGO10 (D), mCherry-AGO4 (E), mCherry-AGO6 (F), mCherry-AGO9 (G), and GFP-AGO7 (H). Scale bars represent 10 µm.

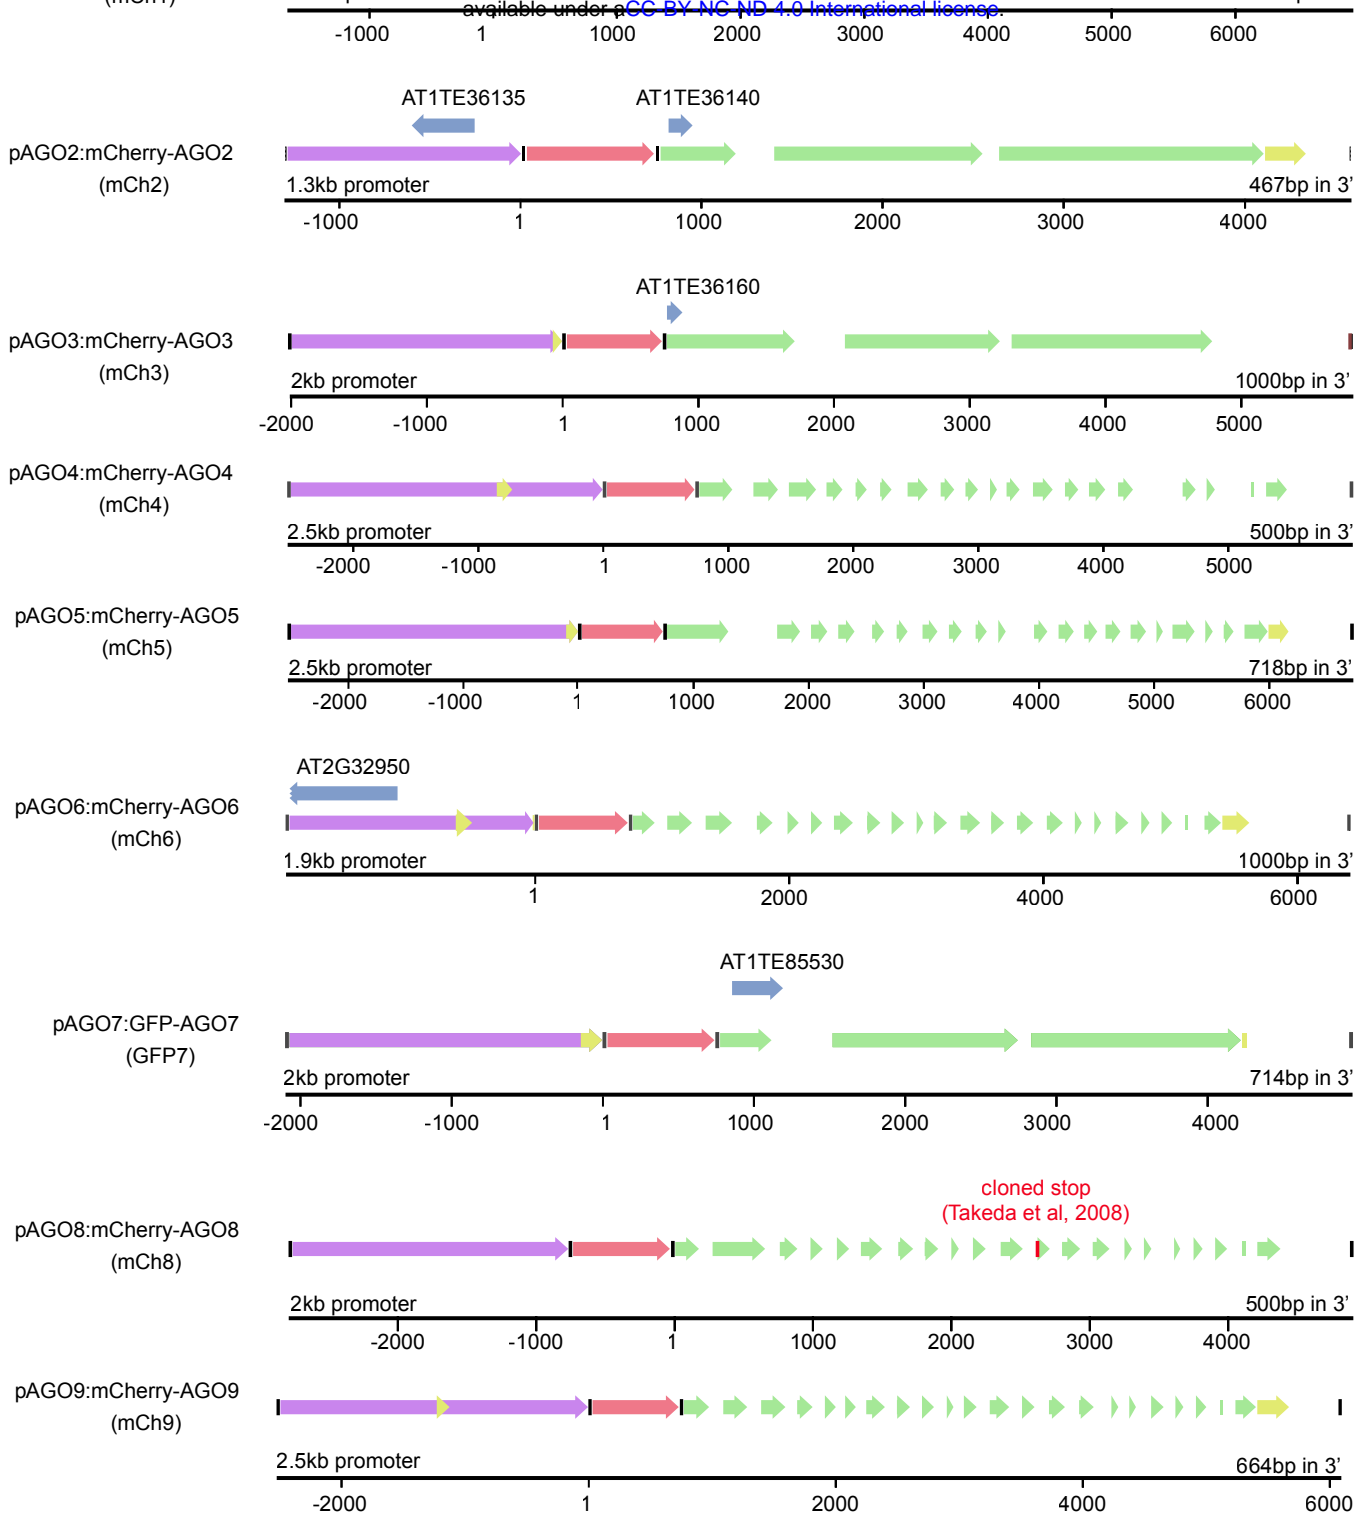

Fig. S1. Schematic representation of the construct used in this study. The different features are represented by arrows: promoter (purple), UTR (yellow), fluorescent protein (red), exon (green) and additional annotation (blue).



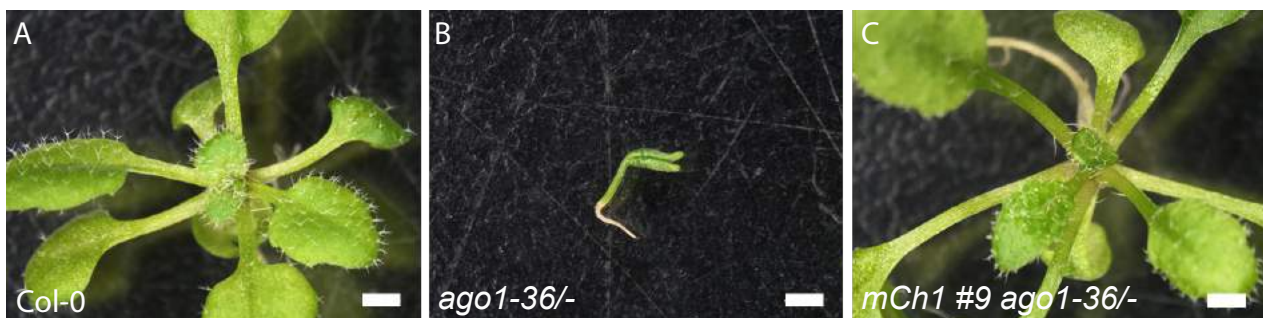

Fig. S2. Complementation of ago1-36 mutant by pAGO1:mCherry-AGO1. Illustrative pictures showing the lack of developmental phenotype in Col-0 (A) and mCh1#9 ago1-36/-(C) compared to ago1-36/-. scale bar represents 1mm.

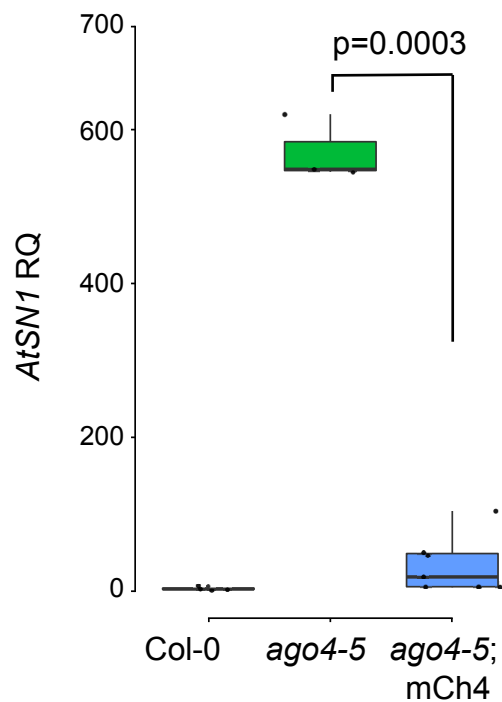

Fig. S3. Complementation of ago4-5 mutant by pAGO4:mCherry-AGO4. qPCR showing the absence of AtSN1 ectopic expression in rosette leaves of seven independent lines expressing the construct pAGO4:mCherry-AGO4 (mCh4) in ago4-5 background compared to Col-0 and ago4-5. Actin2 was used as endogenous control. p indicates the p value obtained by a Student's T-Test.

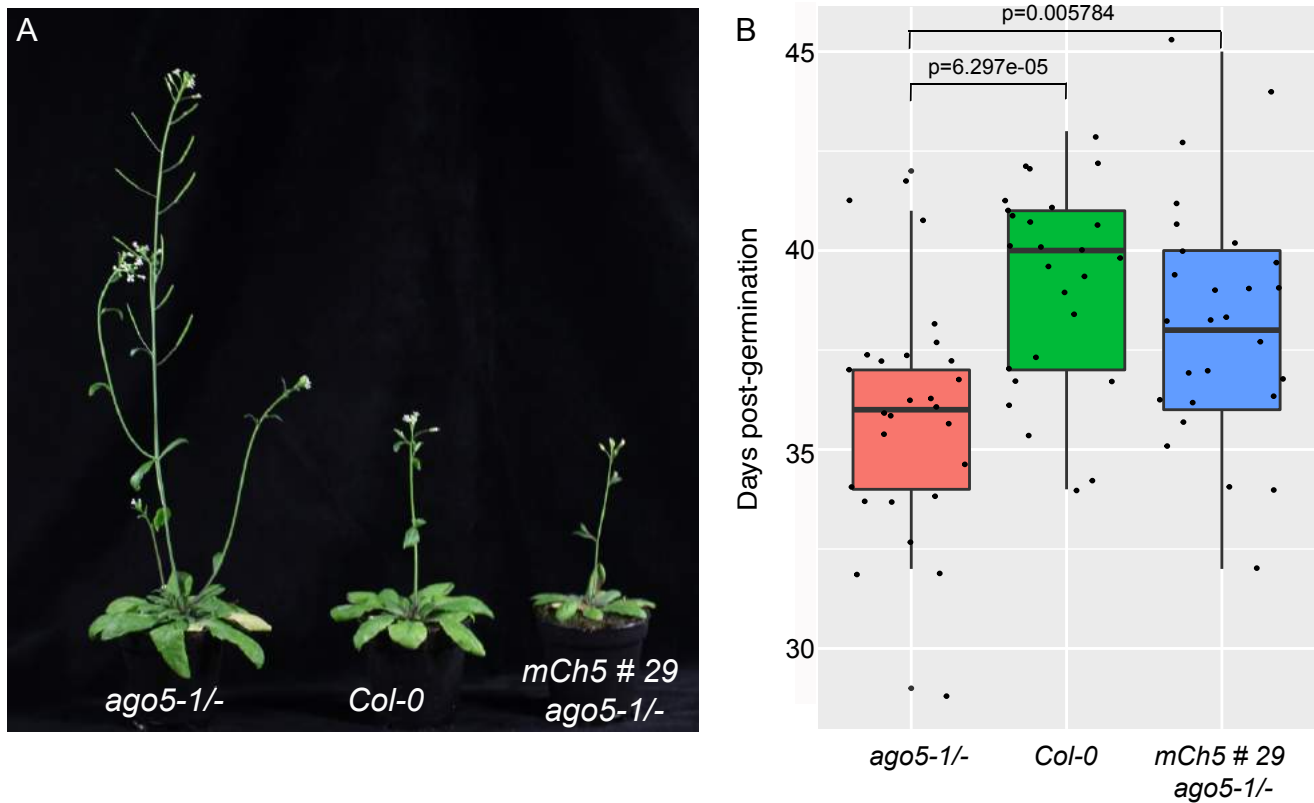

Fig. S4. Complementation of *ago5-1* mutant by pAGO5:mCherry-AGO5. (A) Illustrative pictures of the early flowering phenotype of *ago5-1/-* compared to *Col-0* and *mCh5 #29 ago5-1/-*. (B) Quantification of *ago5-1/-* flowering phenotype in *ago5-1/-* (n=27), *Col-0* (n=26) and *mCh5#29 ago5-1/-* (n=27). p indicates the p value obtained by a Student's T-Test.

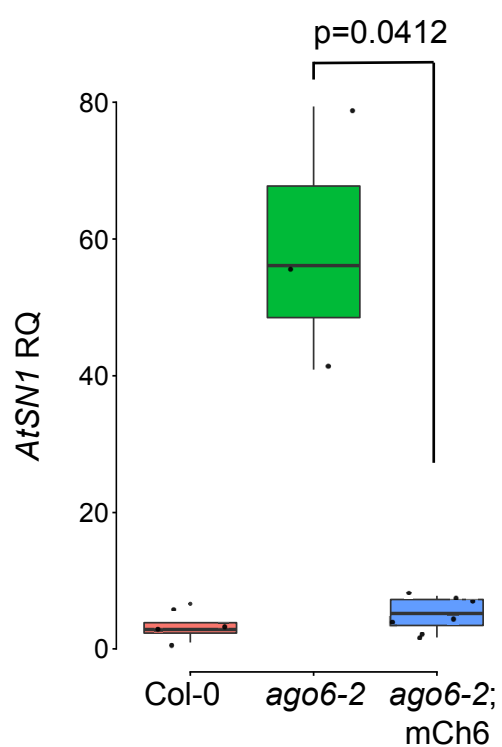

Fig. S5. Complementation of ago6-2 mutant by pAGO6:mCherry-AGO6. qPCR showing the absence of AtSN1 ectopic expression in rosette leaves of seven independent lines expressing the construct pAGO6:mCherry-AGO6 (mCh4) in ago6-2 background compared to Col-0 and ago6-2. Actin2 was used as endogenous control. p indicates the p value obtained by a Student's T-Test.

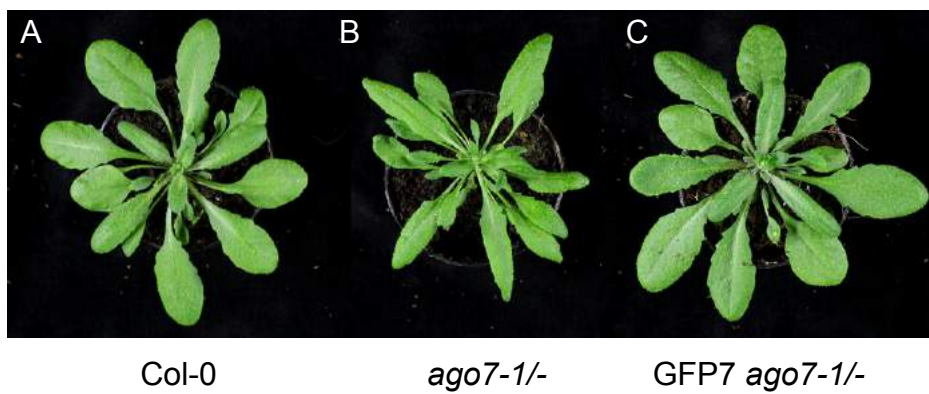

Fig. S6. Complementation of *ago7-1* mutant by pAGO7:GFP-AGO7. Illustrative pictures of the leaf phenotype of *ago7-1*<sup>-/-</sup> (B) compared to Col-0 (A) and GFP-AGO7 *ago7-1*<sup>-/-</sup> (C).

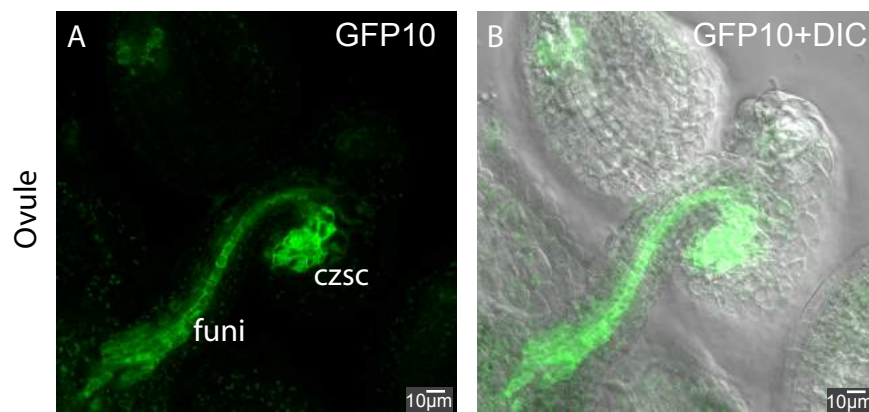

Fig. S7. Additional pictures of pAGO10:GFP-AGO10. (A-B) Picture representing the expression in ovules of GFP-AGO10 in the vascular tissue of the funiculus (funi) and at the vascular termination in the chalazal seed coat (czsc). Scale bars represent 10 μm.

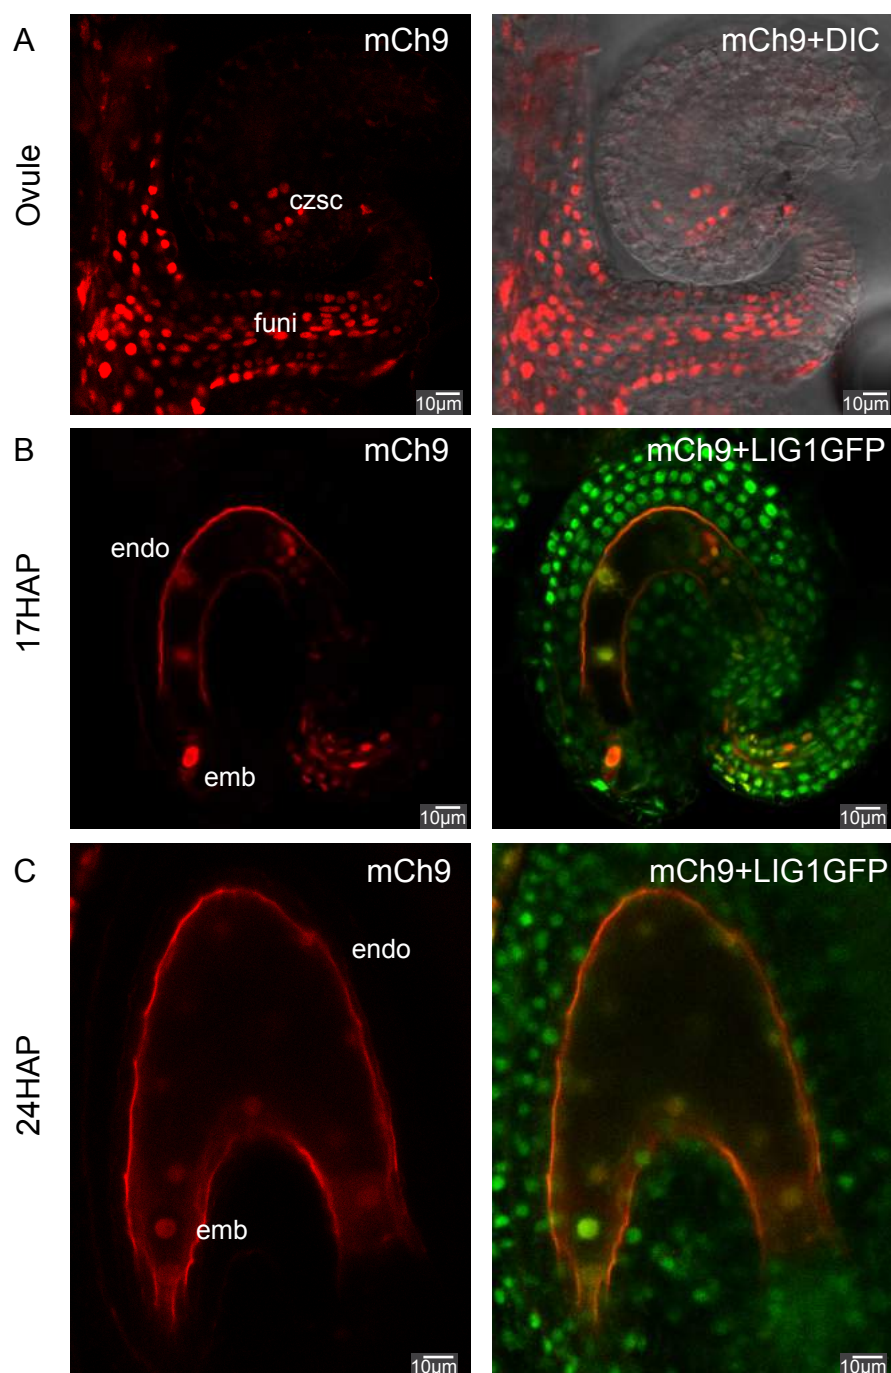

Fig. S8. Additional pictures of pAGO9:mCh-AGO9. (A) Pictures representing the expression in ovules of mCherry-AGO9 in the funiculus (funi) and in the chalazal seed coat (czsc). (B-C) Pictures representing the expression in developing seeds of mCh9 in early embryo and endosperm at 17 hours after pollination (HAP) (B) and at 24 HAP (C). Scale bars represent 10 μm.



A

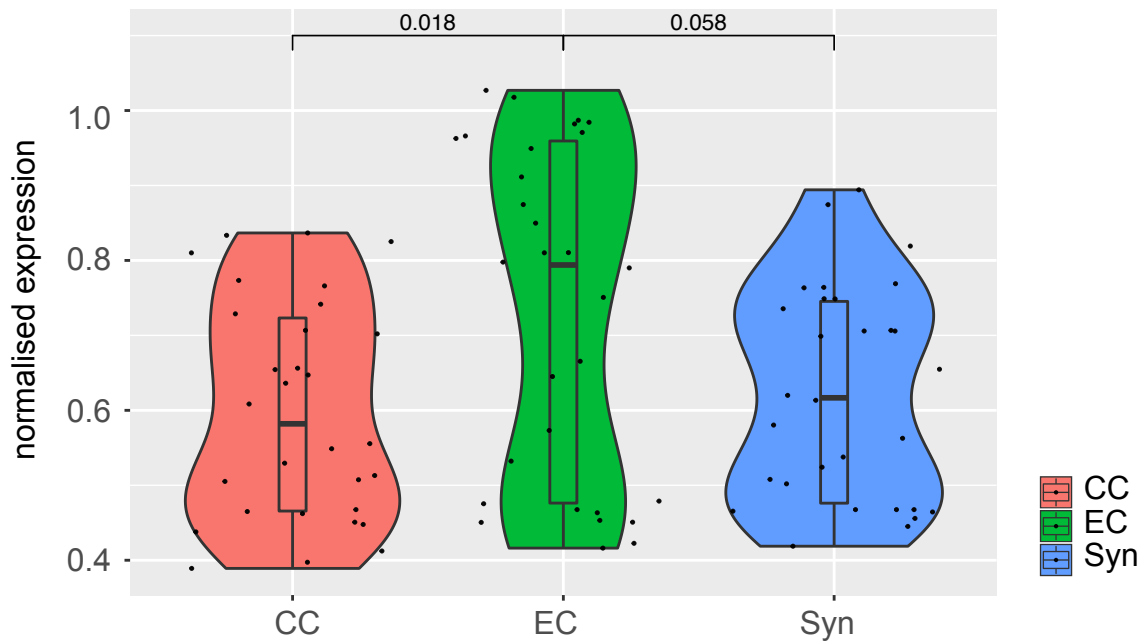

B

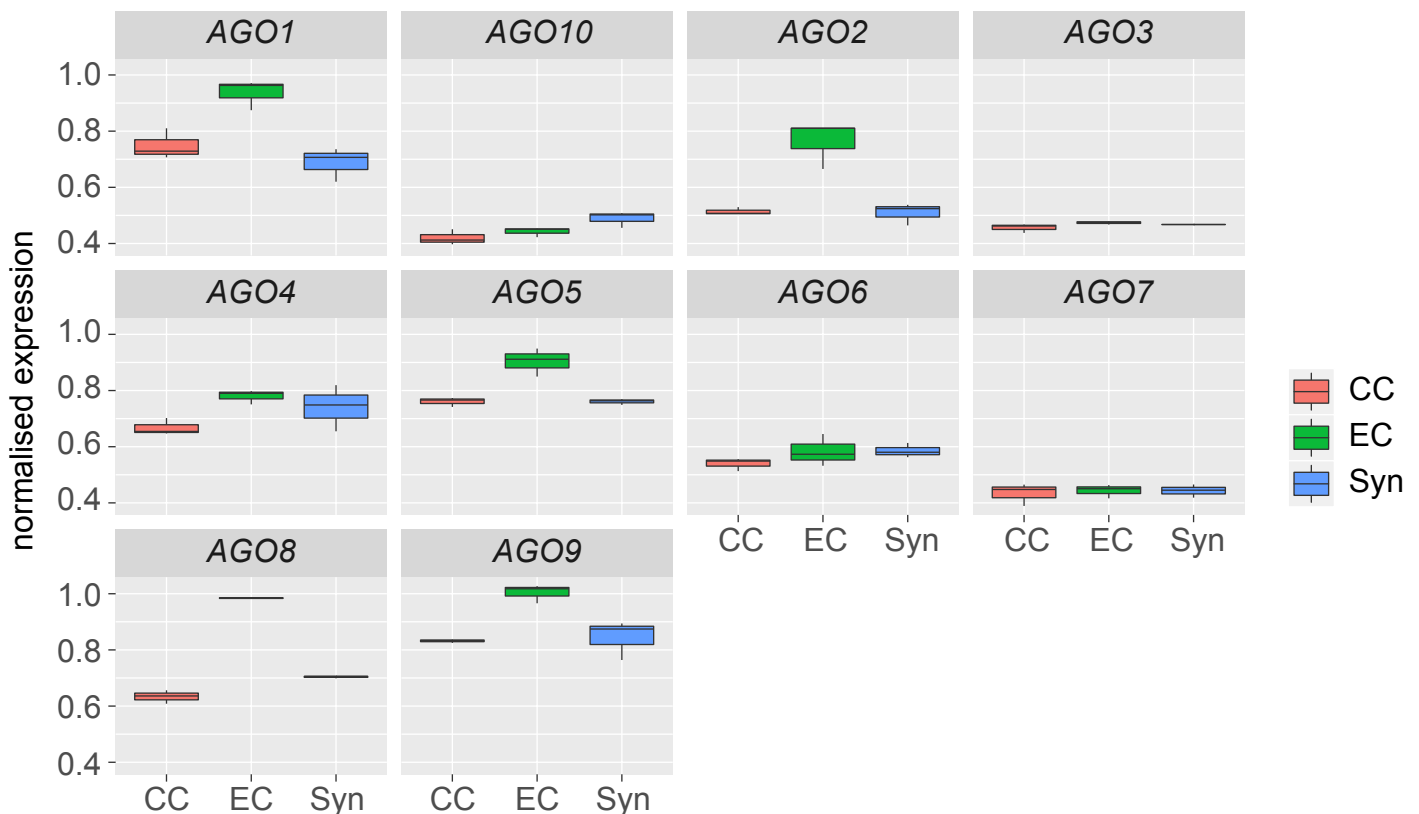

Fig. S9. Arabidopsis Argonautes expression extracted from microarray data of LCM dissected female gametophyte (Wuest et al, 2010) confirming the general enrichment of AGO transcript in the egg cell (EC) compared to central cell (CC) or synergids (Syn). (A) Violin plot representing the general enrichment of AGO expression in the EC. (B) AGOs individual expression boxplot in the different cell type. p values of a Wilcoxon test are indicated.

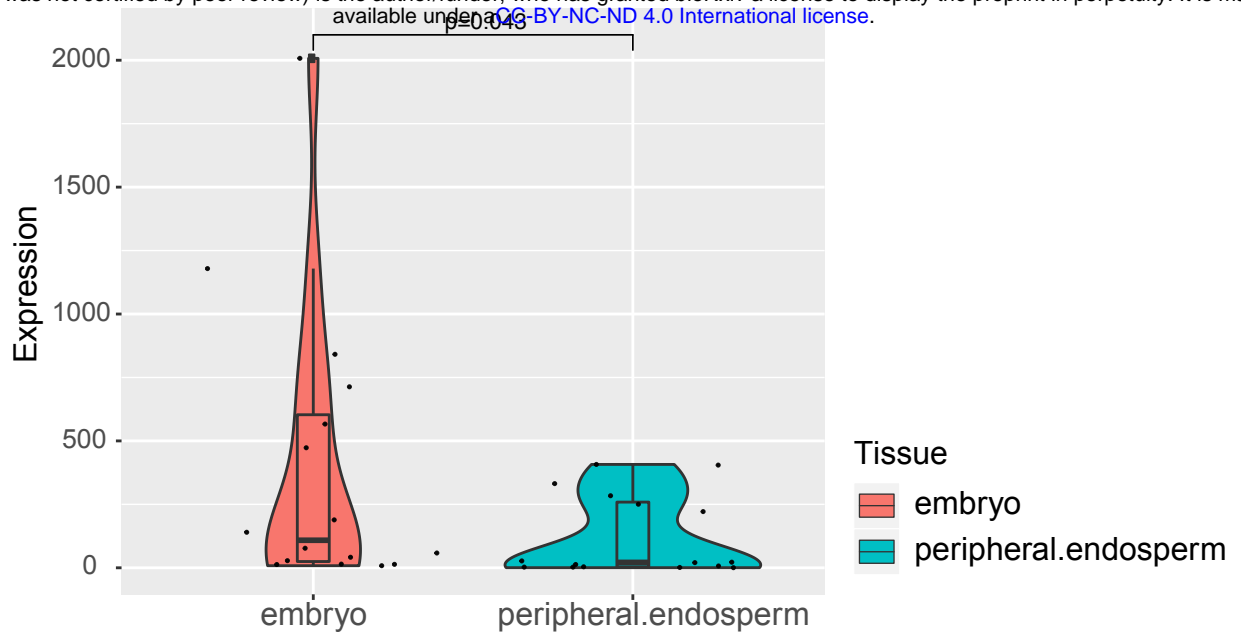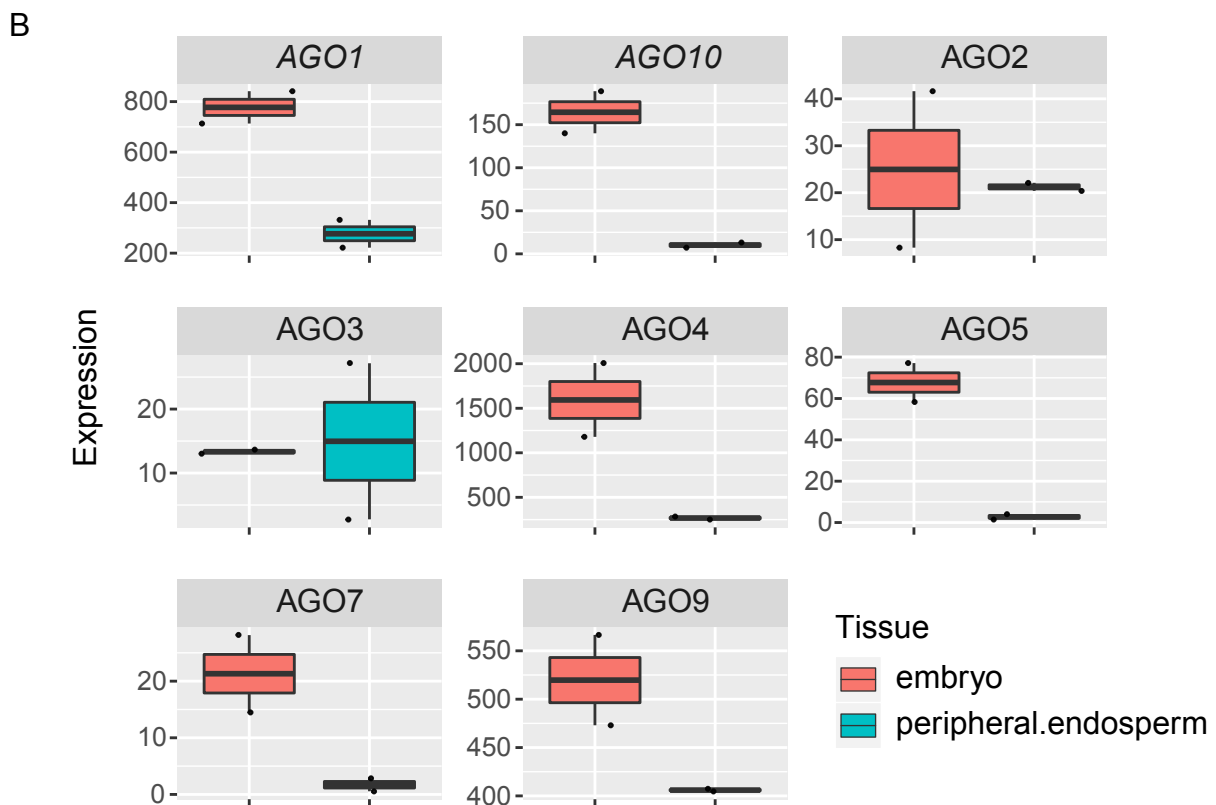

Fig. S10. Arabidopsis Argonautes expression extracted from microarray data of LCM dissected seeds at the pre-globular stage (Belmonte et al., 2013) confirming the general enrichment of AGO transcripts in the embryo compared to the peripheral endosperm. (A) Violin plot representing the general enrichment of AGOs expression in the embryo. (B) AGOs individual expression boxplot in the different cell type. p values of a Wilcoxon test are indicated. AGO6 and AGO8 probes are not present in these data.

|       | female gametophyte |                   |                   | male gametophyte   |                   | developping seed  |           |       | sporophyte         |                    |                    |                    |                    |
|-------|--------------------|-------------------|-------------------|--------------------|-------------------|-------------------|-----------|-------|--------------------|--------------------|--------------------|--------------------|--------------------|
|       | ec                 | syn               | cc                | s                  | v                 | endo              | emb       | heart | nuc                | ii                 | oi                 | czsc               | fu                 |
| AGO1  | expressed          | not expressed     | not expressed     | expressed          | lightly expressed | not expressed     | expressed |       | strongly expressed | expressed          | not expressed      | strongly expressed | expressed          |
| AGO5  | expressed          | not expressed     | not expressed     | expressed          | lightly expressed | not expressed     |           | SAM   | strongly expressed | expressed          | not expressed      | strongly expressed | expressed          |
| AGO10 | not expressed      | not expressed     | not expressed     | not expressed      | not expressed     | not expressed     |           |       | not expressed      | expressed          | not expressed      | strongly expressed | expressed          |
| AGO4  | expressed          | lightly expressed | lightly expressed | expressed          | lightly expressed | not expressed     |           |       | expressed          | strongly expressed | strongly expressed | strongly expressed | expressed          |
| AGO6  | expressed          | lightly expressed | lightly expressed | lightly expressed  | lightly expressed | not expressed     |           |       | expressed          | expressed          | expressed          | expressed          | expressed          |
| AGO8  | not expressed      | not expressed     | not expressed     | not expressed      | not expressed     | not expressed     |           |       | not expressed      | not expressed      | not expressed      | not expressed      | not expressed      |
| AGO9  | strongly expressed | lightly expressed | lightly expressed | expressed          | not expressed     | lightly expressed |           | SAM   | strongly expressed | not expressed      | not expressed      | expressed          | expressed          |
| AGO2  | strongly expressed | not expressed     | not expressed     | expressed          | not expressed     | not expressed     |           |       | not expressed      | not expressed      | not expressed      | not expressed      | not expressed      |
| AGO3  | not expressed      | not expressed     | not expressed     | not expressed      | not expressed     | not expressed     |           |       | not expressed      | not expressed      | not expressed      | not expressed      | strongly expressed |
| AGO7  | strongly expressed | expressed         | expressed         | strongly expressed | not expressed     | not expressed     |           | SAM   | expressed          | strongly expressed | strongly expressed | strongly expressed | expressed          |

Legend :

- Not expressed
- strongly expressed
- expressed
- lightly expressed

Fig S11. Summary table of AGO's expression pattern in reproductive tissues.
